# Supplementary material for: Protective Effect of Alpinia oxyphylla Fruit against tert-Butyl Hydroperoxide-Induced Toxicity in HepG2 Cells via Nrf2 Activation and Free Radical Scavenging and Its Active Molecules
Source: MDPI journal article supplement (doi:10.3390/antiox11051032), 2022-05-23
Supplement: s1 [file s1]

# Protective Effect of *Alpinia oxyphylla* Fruits against *tert*-Butyl hydroperoxide Induced Toxicity in HepG2 Cells via Nrf2 Activation and Free Radical Scavenging

Chae Lee Park <sup>1,2</sup>, Ji Hoon Kim <sup>1</sup>, Je-Seung Jeon <sup>1</sup>, Ju-hee Lee <sup>1</sup>, Kaixuan Zhang <sup>1</sup>, Shuo Guo <sup>1</sup>, Do-hyun Lee <sup>1</sup>, Eun Mei Gao <sup>1</sup>, Rak Ho Son <sup>1,2</sup>, Young-Mi Kim <sup>1</sup>, Gyu Hwan Park <sup>3,\*</sup>, and Chul Young Kim <sup>1,\*</sup>

## 1. Spectral Data of Isolated Compounds 1-12

Figure S1. Isolation scheme of *n*-hexane extract of *A. oxyphylla*.

Figure S2. Isolation scheme of ethyl acetate extract.

Figure S3. <sup>1</sup>H-NMR spectrum of nootkatone (1) (400 MHz, CD<sub>3</sub>OD).

Figure S4. <sup>13</sup>C-NMR spectrum of nootkatone (1) (100 MHz, CD<sub>3</sub>OD).

Figure S5. <sup>1</sup>H-NMR spectrum of eudesma-3,11-dien-2-one (2) (400 MHz, CDCl<sub>3</sub>).

Figure S6. <sup>13</sup>C-NMR spectrum of eudesma-3,11-dien-2-one (2) (100 MHz, CDCl<sub>3</sub>).

Figure S7. <sup>1</sup>H-NMR spectrum of yakuchinone A (3) (400 MHz, CDCl<sub>3</sub>).

Figure S8. <sup>13</sup>C-NMR spectrum of yakuchinone A (3) (100 MHz, CDCl<sub>3</sub>).

Figure S9. <sup>1</sup>H-NMR spectrum of 5'-hydroxyl-yakuchinone A (4) (400 MHz, CDCl<sub>3</sub>).

Figure S10. <sup>1</sup>H-NMR spectrum of 5'-hydroxyl-yakuchinone A (4) (300 MHz, CD<sub>3</sub>OD).

Figure S11. <sup>13</sup>C-NMR spectrum of 5'-hydroxyl-yakuchinone A (4) (100 MHz, CDCl<sub>3</sub>).

Figure S12. <sup>1</sup>H-<sup>1</sup>H COSY spectrum of 5'-hydroxyl-yakuchinone A (4) (400 MHz, CDCl<sub>3</sub>).

Figure S13. HSQC spectrum of 5'-hydroxyl-yakuchinone A (4) (CDCl<sub>3</sub>).

Figure S14. HMBC spectrum of 5'-hydroxyl-yakuchinone A (4) (CDCl<sub>3</sub>).

Figure S15. DEPE-135 spectrum of 5'-hydroxyl-yakuchinone A (4) (CDCl<sub>3</sub>).

Figure S16. ESI-MS spectrum of 5'-hydroxyl-yakuchinone A (4).

Figure S17. <sup>1</sup>H-NMR spectrum of alpinenone (5) (500 MHz, CDCl<sub>3</sub>).

Figure S18. <sup>13</sup>C-NMR spectrum of alpinenone (5) (125 MHz, CDCl<sub>3</sub>).

Figure S19. <sup>1</sup>H-NMR spectrum of 6 $\alpha$ -hydroxy-7-*epi*- $\alpha$ -cyperone (6) (400 MHz, CD<sub>3</sub>OD).

Figure S20. <sup>13</sup>C-NMR spectrum of 6 $\alpha$ -hydroxy-7-*epi*- $\alpha$ -cyperone (6) (100 MHz, CD<sub>3</sub>OD).

Figure S21. <sup>1</sup>H-NMR spectrum of (4*S*\*,5*E*,10*R*\*)-7-oxo-tri-*nor*-eudesm-5-en-4 $\beta$ -ol (7) (400 MHz, CDCl<sub>3</sub>).

Figure S22. <sup>13</sup>C-NMR spectrum of (4*S*\*,5*E*,10*R*\*)-7-oxo-tri-*nor*-eudesm-5-en-4 $\beta$ -ol (7) (100 MHz, CDCl<sub>3</sub>).

Figure S23. <sup>1</sup>H-NMR spectrum of teuhetenone A (8) (400 MHz, CDCl<sub>3</sub>).

Figure S24. <sup>13</sup>C-NMR spectrum of teuhetenone A (8) (100 MHz, CDCl<sub>3</sub>).

Figure S25. <sup>1</sup>H-NMR spectrum of 7-*epi*-teucrenone B (9) (400 MHz, CDCl<sub>3</sub>).

Figure S26. <sup>13</sup>C-NMR spectrum of 7-*epi*-teucrenone B (9) (100 MHz, CDCl<sub>3</sub>).

Figure S27. <sup>1</sup>H-NMR spectrum of 11-hydroxyvalenc-1(10)-en-2-one (10) (400 MHz, CDCl<sub>3</sub>).

Figure S28. <sup>13</sup>C-NMR spectrum of 11-hydroxyvalenc-1(10)-en-2-one (10) (100 MHz, CDCl<sub>3</sub>).

Figure S29. <sup>1</sup>H-NMR spectrum of oxyphyllenodiol A (11) (400 MHz, CDCl<sub>3</sub>).

Figure S30. <sup>13</sup>C-NMR spectrum of oxyphyllenodiol A (11) (100 MHz, CDCl<sub>3</sub>).

Figure S31. <sup>1</sup>H-NMR spectrum of oxyphyllenodiol B (11) (400 MHz, CDCl<sub>3</sub>).

Figure S32. <sup>13</sup>C-NMR spectrum of oxyphyllenodiol B (11) (100 MHz, CDCl<sub>3</sub>).

Figure S33. HPLC chromatograms of crude extract and isolated compounds 1 – 12.

Table S1. Partition coefficients of major peaks 1 and 2 of *A. oxyphylla* for CPC operation.

Table S2. Retention time and calibration curves of compounds 1 – 12.

## Spectral Data of Isolated Compounds 1 - 12

Nootkatone (1):  $C_{15}H_{22}O$ , ESI-MS:  $m/z$  219.2  $[M+H]^+$ ,  $^1H$  NMR (400 MHz,  $CD_3OD$ )  $\delta$  5.73 (1H, s, H-1), 4.71 (2H, s, H-12), 2.58 (1H, td,  $J = 14.8, 5.1$  Hz), 2.43-2.28 (3H, m), 2.15 (1H, dd,  $J = 17.2, 3.8$  Hz), 2.04-1.85 (1H, m), 1.39-1.27 (1H, m), 1.72 (3H, s, H-13), 1.13 (3H, s, H-15), 0.96 (3H, d,  $J = 6.8$  Hz, H-14), 0.9-0.84 (1H, m, H-3,4,6,7,8,9),  $^{13}C$ -NMR (100 MHz,  $CD_3OD$ )  $\delta$  202.2 (C-2), 174.2 (C-10), 150.4 (C-11), 125.0 (C-1), 109.7 (C-12), 45.3 (C-9), 42.8 (C-3), 41.8 (C-7), 41.5 (C-4), 40.7 (C-5), 34.1 (C-6), 33.0 (C-8), 21.1 (C-13), 17.2 (C-15), 15.2 (C-14).

Eudesma-3,11-dien-2-one (2):  $C_{15}H_{22}O$ , ESI-MS:  $m/z$  219.1  $[M+H]^+$ ,  $^1H$  NMR (400 MHz,  $CDCl_3$ )  $\delta$  5.88 (1H, m, H-3), 4.99 (1H, dd,  $J = 2.9, 1.4$  Hz, H-13a), 4.87 (1H, s, H-13b), 2.49 (2H, ddd,  $J = 10.2, 2.8, 1.4$  Hz, H-5,7), 2.19 (2H, d,  $J = 3.0$  Hz, H-1), 2.18-2.14 (1H, m, H-8a), 1.90 (3H, t,  $J = 1.4$  Hz, H-15), 1.89-1.87 (1H, m, H-6a), 1.78 (3H, s, H-12), 1.76 (1H, s, H-6b), 1.58 (1H, s, H-9a), 1.56-1.53 (1H, m, H-8b), 1.31-1.28 (1H, m, H-9b), 0.93 (3H, s, H-14).  $^{13}C$  NMR (100 MHz,  $CDCl_3$ )  $\delta$  199.5 (C-2), 163.7 (C-4), 146.0 (C-11), 127.2 (C-3), 111.7 (C-13), 54.9 (C-1), 42.9 (C-5), 39.1 (C-7), 38.2 (C-10), 35.9 (C-9), 25.2 (C-8), 22.9 (C-6), 22.8 (C-12), 22.1 (C-15), 16.7 (C-14).

Yakuchinone A (3):  $C_{20}H_{24}O_3$ , ESI-MS:  $m/z$  313.4  $[M+H]^+$ ,  $^1H$  NMR (400 MHz,  $CDCl_3$ )  $\delta$  7.27-7.23 (2H, m, H-3'', 5''), 7.16 (3H, dd,  $J = 12.0, 7.2$  Hz, H-2'', 4'', 6''), 6.81 (1H, d,  $J = 7.9$  Hz, H-5'), 6.68-6.63 (2H, m, H-2', 6'), 3.84 (3H, s,  $OCH_3$ ), 2.81 (2H, t,  $J = 7.5$  Hz, H-1), 2.67 (2H, t,  $J = 7.5$  Hz, H-2), 2.59 (2H, t,  $J = 6.9$  Hz, H-7), 2.39 (2H, t,  $J = 6.6$  Hz, H-4), 1.58 (4H, dd,  $J = 6.7, 3.3$  Hz, H-5,6).  $^{13}C$ -NMR (100 MHz,  $CDCl_3$ )  $\delta$  210.4 (C-3), 146.5 (C-3'), 144.0 (C-4'), 142.3 (C-1''), 133.1 (C-1'), 128.5 (C-3'', 5''), 128.4 (C-2'', 6''), 125.9 (C-4''), 120.9 (C-6'), 114.4 (C-5'), 111.1 (C-2'), 56.0 ( $OCH_3$ ), 44.7 (C-2), 43.0 (C-4), 35.8 (C-7), 31.1 (C-6), 29.6 (C-1), 23.5 (C-5).

5'-Hydroxyl-yakuchinone A (4):  $C_{20}H_{24}O_4$ , ESI-MS:  $m/z$  329.3  $[M+H]^+$ , 351.4  $[M+Na]^+$ ,  $^1H$ -NMR (400 MHz,  $CD_3OD$ )  $\delta$  7.23-7.18 (2H, m, H-3'', 5''), 7.11 (3H, d,  $J = 7.0, H-2'', 4'', 6''$ ), 6.78 (1H, d,  $J = 2.0$  Hz, H-6'), 6.65 (1H, d,  $J = 2.0$  Hz, H-2'), 3.86 (3H, s,  $OCH_3$ ), 2.83-2.78 (2H, m, H-1), 2.77-2.71 (2H, m, H-2), 2.55 (2H, t,  $J = 7.1$  Hz, H-7), 2.43 (2H, dd,  $J = 8.6, 5.1$  Hz, H-4), 1.53 (4H, dt,  $J = 7.1, 3.6$  Hz, H-5,6).  $^{13}C$ -NMR (100 MHz,  $CDCl_3$ )  $\delta$  210.4 (C-3), 147.3 (C-3'), 142.3 (C-4'), 141.0 (C-1''), 133.2 (C-1'), 128.5 (C-3'', 5''), 128.4 (C-2'', 6''), 125.9 (C-4''), 124.5 (C-6'), 122.8 (C-5'), 110.8 (C-2'), 56.2 ( $OCH_3$ ), 44.7 (C-2), 43.0 (C-4), 35.9 (C-7), 31.1 (C-6), 29.7 (C-1), 23.5 (C-5).

Alpinenone (5):  $C_{15}H_{22}O_3$ ,  $^1H$ -NMR (500 MHz,  $CDCl_3$ )  $\delta$  5.90 (1H, s, H-8), 2.91 (1H, dd,  $J = 13.5, 6.8$  Hz, H-11), 2.88-2.83 (1H, m, H-1), 2.80-2.74 (1H, m, H-5), 2.03 (1H, dd,  $J = 13.8, 6.8$  Hz, H-4), 1.44 (3H, s, H-15), 1.40-1.34 (2H, m), 1.40-1.34 (2H, m, H-2a), 1.22 (3H, d,  $J = 6.6$  Hz, H-13), 1.19 (1H, s, H-2b), 1.15 (3H, d,  $J = 6.8$  Hz, H-12), 1.08 (3H, d,  $J = 7.2$  Hz, H-14).  $^{13}C$ -NMR (125 MHz,  $CDCl_3$ )  $\delta$  199.3 (C-9), 176.5 (C-7), 123.6 (C-8), 105.5 (C-6), 88.2 (C-10), 63.1 (C-5), 52.5 (C-1), 36.4 (C-4), 33.0 (C-2), 30.1 (C-11), 25.7 (C-13), 24.6 (C-3), 20.8 (C-15), 20.7 (C-12), 14.5 (C-14).

6 $\alpha$ -Hydroxy-7-*epi*- $\alpha$ -cyperone (6):  $C_{15}H_{22}O_2$ ,  $^1H$ -NMR (400 MHz,  $CD_3OD$ )  $\delta$  4.84 (1H, s, H-6), 4.80 (1H, s, H-12 $\alpha$ ), 4.39 (1H, s, H-12 $\beta$ ), 2.65 (1H, m, H-2 $\alpha$ ), 2.48 (1H, s, H-7), 2.34 (1H, dd,  $J = 17.8, 3.3$  Hz, H-2 $\beta$ ), 2.22 (1H, m, 8 $\alpha$ ), 1.83 (3H, s, H-15), 1.77 (1H, m, H-1 $\beta$ ), 1.73 (3H, s, H-13), 1.61 (1H, dd,  $J = 12.9, 4.5$ , H-1 $\alpha$ ), 1.53-1.44 (3H, dd,  $J = 25.5, 13.6$  Hz, H-8b, H-9a, H-9b), 1.38 (3H, s, H-14).  $^{13}C$ -NMR (100 MHz,  $CD_3OD$ )  $\delta$  202.1 (C-3), 162.8 (C-5), 147.0 (C-11), 132.6 (C-4), 111.8 (C-12), 69.8 (C-6), 49.2 (C-7), 40.0 (C-1), 36.3 (C-9), 36.3 (C-10), 35.0 (C-2), 25.7 (C-14), 23.4 (C-13), 19.5 (c-8), 10.6 (C-15).

(4*S*\*, 5*E*, 10*R*\*)-7-Oxo-tri-nor-eudesm-5-en-4 $\beta$ -ol (7):  $C_{12}H_{18}O_2$ ,  $^1H$ -NMR (400 MHz,  $CDCl_3$ )  $\delta$  6.03 (1H, s, H-6), 2.65-2.54 (1H, m, H-8a), 2.39 (1H, d,  $J = 17.6$  Hz, H-8b), 2.16-2.02 (1H, m, H-2a), 1.93 (1H, d,  $J = 12.4$  Hz, H-3a), 1.85 (1H, dd,  $J = 14.6, 4.4$  Hz, H-9a), 1.70 (1H, d,  $J = 3.8$  Hz, H-9b), 1.67 (1H, d,  $J = 2.5$  Hz, H-1a), 1.54 (1H, d,  $J = 4.2$ , H-2b), 1.51 (1H, s, H-3b), 1.45 (3H, s, H-11), 1.42 (3H, s, H-12), 1.34 (1H,

td,  $J = 13.4, 3.1$  Hz, H-1b).  $^{13}\text{C}$ -NMR (100 MHz,  $\text{CDCl}_3$ )  $\delta$  201.4 (C-7), 170.0 (C-5), 123.4 (C-6), 71.6 (C-4), 41.4 (C-1), 40.4 (C-3), 40.3 (C-9), 36.0 (C-10), 34.2 (C-8), 29.2 (C-12), 24.6 (C-11), 17.4 (C-2).

Teuhetenone A (**8**):  $\text{C}_{12}\text{H}_{18}\text{O}_2$ ,  $^1\text{H}$ -NMR (400 MHz,  $\text{CDCl}_3$ )  $\delta$  6.35 (1H, s, H-6), 2.62-2.52 (1H, m, H-9a), 2.38 (1H, d,  $J = 17.7$  Hz, H-9b), 1.98 (1H, d,  $J = 12.9$ , H-8a), 1.89 (1H, dd,  $J = 14.3$  Hz, H-3a), 1.78 (1H, d,  $J = 5.1$  Hz, H-1a), 1.75-1.70 (2, m, H-2), 1.66 (1H, d,  $J = 15.3$  Hz, H-3b), 1.56 (1H, td,  $J = 12.5, 5.2$  Hz, H-8b), 1.43 (3H, s, H-12), 1.40-1.33 (1H, m, H-1b), 1.31 (3H, s, H-11).  $^{13}\text{C}$ -NMR (100 MHz,  $\text{CDCl}_3$ )  $\delta$  200.6 (C-7), 175.2 (C-5), 122.7 (C-6), 72.5 (C-4), 42.4 (C-8), 41.0 (C-3), 40.8 (C-1), 36.3 (C-10), 34.1 (C-9), 29.8 (C-12) 24.7 (C-11), 19.6 (C-2).

7-*epi*-Teucrenone B (**9**):  $\text{C}_{15}\text{H}_{22}\text{O}_2$ ,  $^1\text{H}$ -NMR (400 MHz,  $\text{CDCl}_3$ )  $\delta$  5.89 (1H, s, H-3), 5.10 (2H, s, H-12), 2.36 (1H, d,  $J = 13.1$  Hz, H-6a), 2.31 (1H, s, H-5), 2.27 (1H, s, H-1a), 2.14 (1H, s, H-1b), 2.11 (1H, dd,  $J = 12.7, 4.0$  Hz, H-8a), 1.93 (3H, s, H-15), 1.85 (3H, s, H-13), 1.82-1.73 (1H, m, H-8b), 1.57 (1H, d,  $J = 13.1$  Hz, H-6b), 1.48 (2H, dd,  $J = 7.9, 3.7$  Hz, H-9), 0.94 (3H, s, H-14).  $^{13}\text{C}$ -NMR (100 MHz,  $\text{CDCl}_3$ )  $\delta$  199.1 (C-2), 162.3 (C-4), 146.2 (C-11), 127.1 (C-3), 114.3 (C-12), 74.9 (C-7), 54.3 (C-1), 45.0 (C-5), 37.8 (C-9), 37.6 (C-10), 33.2 (C-6), 31.7 (C-8), 22.1 (C-15), 18.8 (C-13), 17.1 (C-14).

11-Hydroxyvalenc-1(10)-en-2-one (**10**):  $\text{C}_{15}\text{H}_{24}\text{O}_2$ ,  $^1\text{H}$ -NMR (500 MHz,  $\text{CDCl}_3$ )  $\delta$  5.75 (1H, s, H-1), 2.46 (1H, dd,  $J = 5.2, 1.7$  Hz, H-9a), 2.38 (1H, dd,  $J = 4.1, 2.7$  Hz, H-9b), 2.23 (2H, d,  $J = 4.5$  Hz, H-3), 2.03-2.01 (1H, m, H-6a), 2.01-1.98 (1H, m, H-8), 1.96-1.95 (1H, m, H-4), 1.71 (1H, dd,  $J = 6.6, 3.6$  Hz, H-7), 1.19 (3H, s, H-12), 1.17 (3H, s, H-13), 1.07 (3H, s, H-15), 0.97 (1H, s, H-6b), 0.96 (3H, d,  $J = 6.8$  Hz, H-14).  $^{13}\text{C}$ -NMR (125 MHz,  $\text{CDCl}_3$ )  $\delta$  200.3 (C-2), 171.5 (C-10), 124.5 (C-1), 72.6 (C-11), 43.9 (C-7), 42.1 (C-3), 40.6 (C-4), 39.7 (C-6), 39.3 (C-5), 33.1 (C-9), 27.8 (C-8), 27.4 (C-12), 26.9 (C-13), 17.0 (C-15), 15.1 (C-14).

Oxyphyllenodiol A (**11**):  $\text{C}_{14}\text{H}_{22}\text{O}_3$ ,  $^1\text{H}$ -NMR (400 MHz,  $\text{CDCl}_3$ )  $\delta$  4.16 (1H, br s, H-4), 2.66-2.60 (1H, m, H-6), 2.56-2.50 (1H, m, H-8a), 2.50-2.45 (1H, m, H-1a), 2.33 (1H, t,  $J = 6.1$  Hz, H-8b), 2.29 (1H, t,  $J = 6.2$ , H-1b), 2.22-2.17 (1H, m, H-11), 1.99-1.93 (1H, m, H-7), 1.78 (1H, ddd,  $J = 13.4, 8.4, 6.5$  Hz, H-2a), 1.66 (1H, ddd,  $J = 13.3, 6.3, 5.3$  Hz, H-2b), 1.22 (3H, s, H-14), 1.06 (3H, d,  $J = 6.8$  Hz, H-13), 0.91 (3H, d,  $J = 6.9$  Hz, H-12).  $^{13}\text{C}$ -NMR (100 MHz,  $\text{CDCl}_3$ )  $\delta$  199.9 (C-9), 157.5 (C-5), 132.7 (C-10), 75.3 (C-4), 72.3 (C-3), 40.3 (C-6), 35.1 (C-8), 32.2 (C-2), 30.0 (C-11), 22.5 (C-7), 22.1 (C-14), 21.7 (C-13), 21.6 (C-1), 19.3 (C-12).

Oxyphyllenodiol B (**12**):  $\text{C}_{14}\text{H}_{22}\text{O}_3$ ,  $^1\text{H}$ -NMR (400 MHz,  $\text{CDCl}_3$ )  $\delta$  3.96 (1H, d,  $J = 5.8$  Hz, H-4), 2.64-2.58 (1H, m, H-6), 2.51 (1H, ddd,  $J = 17.2, 8.8, 5.1$  Hz, H-8a), 2.34 (2H, dd,  $J = 8.3, 5.7$  Hz, H-1), 2.3 (1H, s, H-8b), 2.27-2.20 (1H, m, H-11), 2.11 (1H, s,  $J = 5.2$  Hz, H-7a), 1.99 (1H, ddd,  $J = 13.9, 5.3, 3.4$  Hz, H-7b), 1.90-1.80 (1H, m, H-2a), 1.59 (1H, dt,  $J = 13.2, 9.2$  Hz, H-2b), 1.27 (3H, s, H-14), 1.04 (3H, d,  $J = 6.8$  Hz, H-13), 0.85 (3H, d,  $J = 6.9$  Hz, H-12).  $^{13}\text{C}$ -NMR (100 MHz,  $\text{CDCl}_3$ )  $\delta$  199.9 (C-9), 156.5 (C-5), 133.5 (C-10), 72.5 (C-4), 70.3 (C-3), 41.3 (C-6), 35.6 (C-8), 31.3 (C-2), 29.2 (C-11), 25.2 (C-14), 22.0 (C-7), 21.5 (C-13), 20.8 (C-1), 18.6 (C-12).

**Table S1.** Partition coefficients of major peaks 1 and 2 of *A. oxyphylla* for CPC operation.

| Solvent systems<br><i>n</i> -hexane/EtOAc/methanol/water, v/v/v/v) | K values of the peaks 1 and 2 |             |
|--------------------------------------------------------------------|-------------------------------|-------------|
|                                                                    | Peak 1                        | Peak 2      |
| 9:1:9:1                                                            | 0.10                          | 0.59        |
| 8:2:8:2                                                            | 0.32                          | 0.15        |
| <b>7:3:7:3</b>                                                     | <b>0.57</b>                   | <b>2.22</b> |
| 6:4:6:4                                                            | 1.33                          | 4.32        |
| 6:4:6:4                                                            | 1.69                          | 3.34        |
| 7:3:5:5                                                            | 2.89                          | 4.79        |

EtOAc: ethyl acetate

After considering *K* values of peaks **1** and **2**, two-phase solvent system with hexane/EtOAc/methanol/water (7:3:7:3, v/v/v/v) was chosen for CPC operation. Peaks **1** and **2** were marked in Figure S1B.

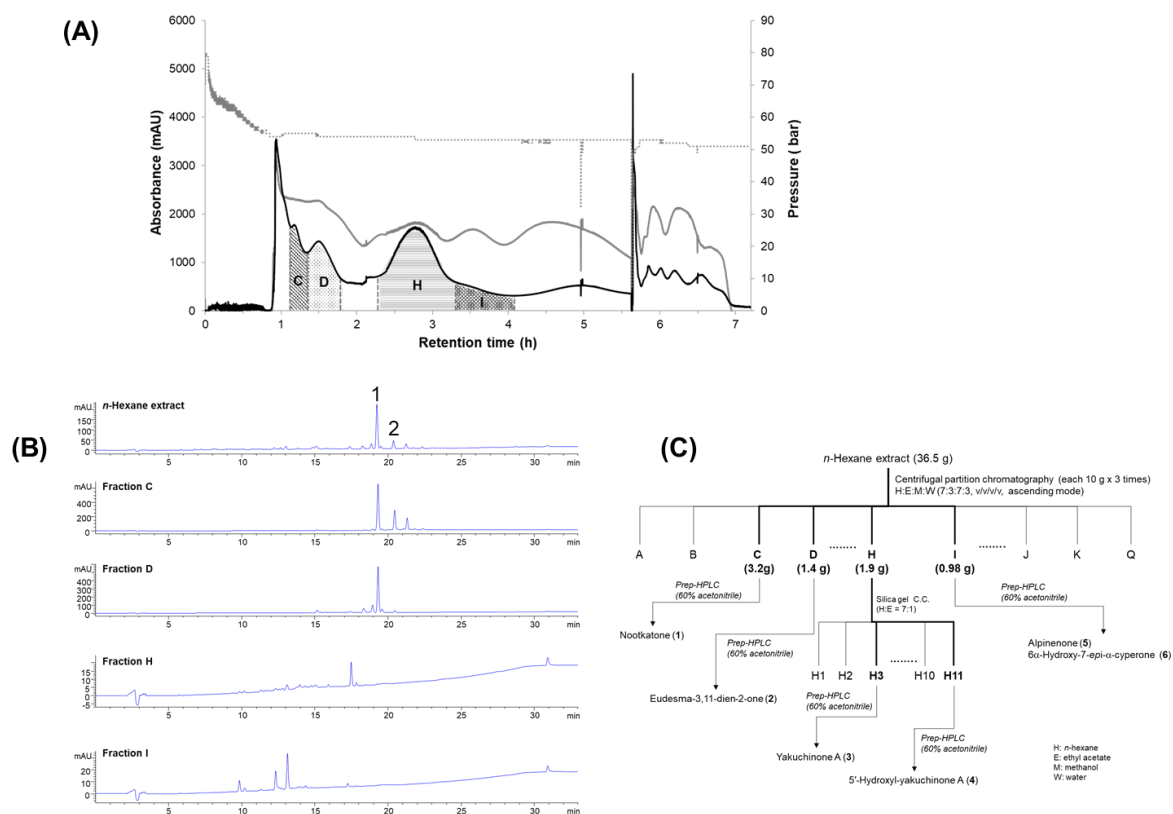

**Figure S1.** Isolation scheme of *n*-hexane extract of *A. oxyphylla*. (A) CPC chromatogram of *n*-hexane extract of *A. oxyphylla*, (B) HPLC chromatograms fractions C, D, H, and I obtained from CPC and (C) Isolation scheme of *n*-hexane extract. CPC and HPLC operation conditions were described in Materials and Methods Section.

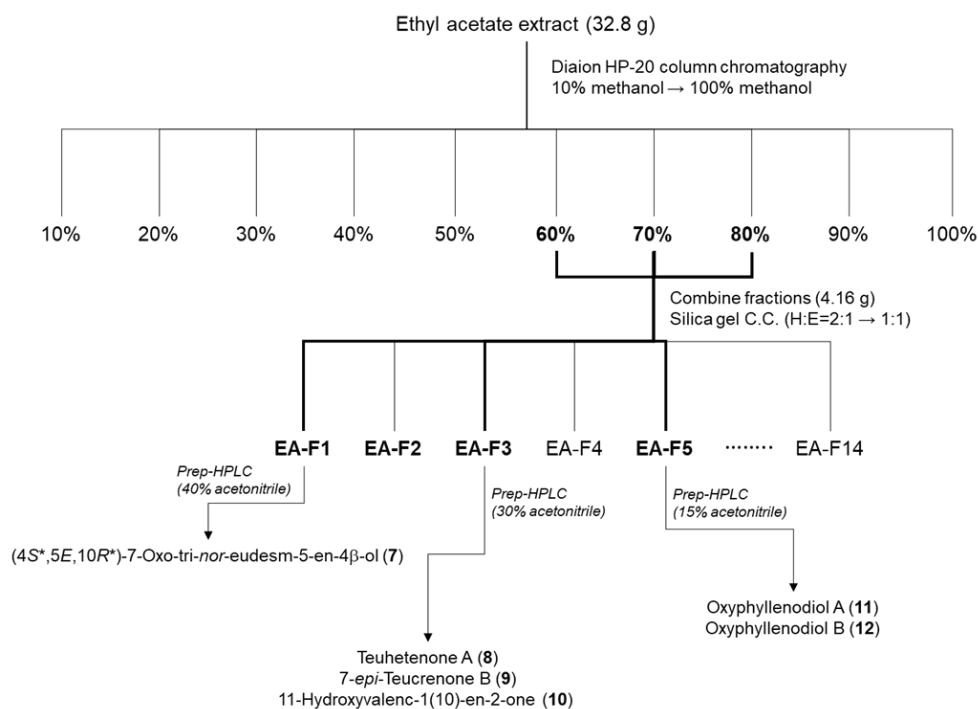

**Figure S2.** Isolation scheme of ethyl acetate extract.

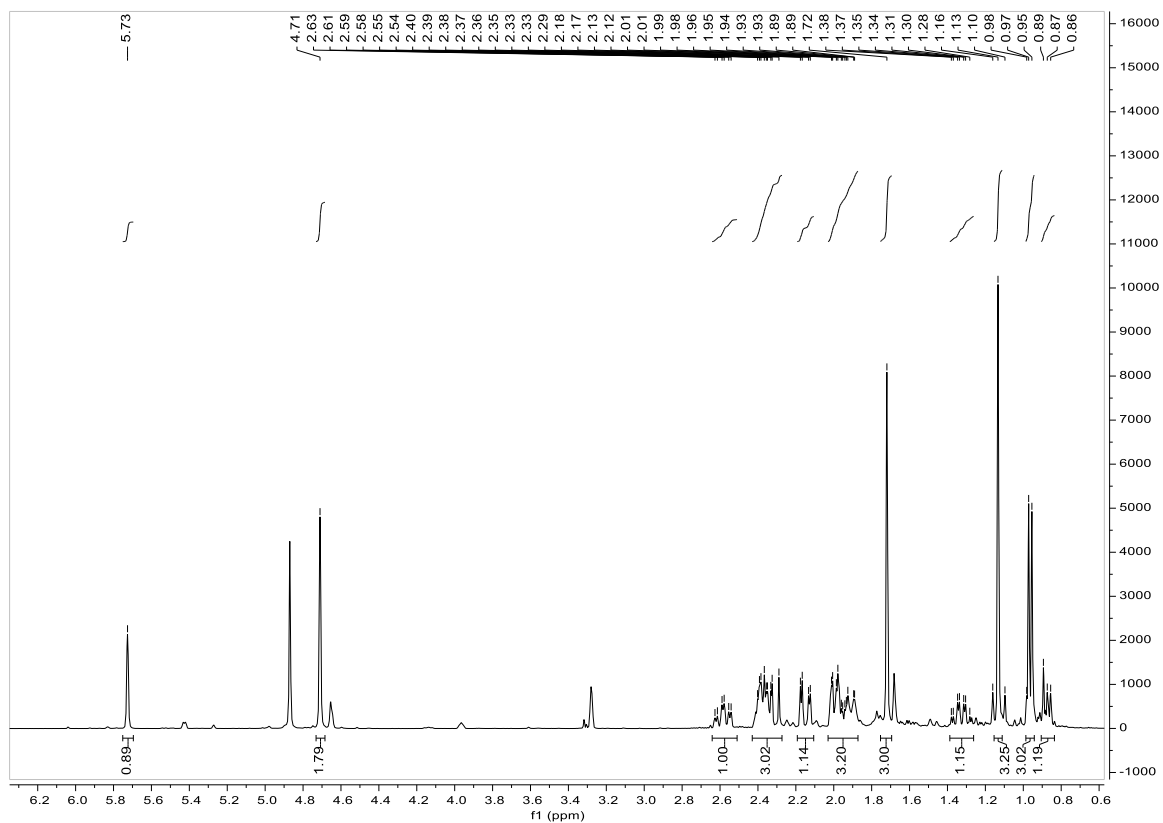

**Figure S3.**  $^1\text{H}$ -NMR spectrum of nootkatone (**1**) (400 MHz,  $\text{CD}_3\text{OD}$ ).

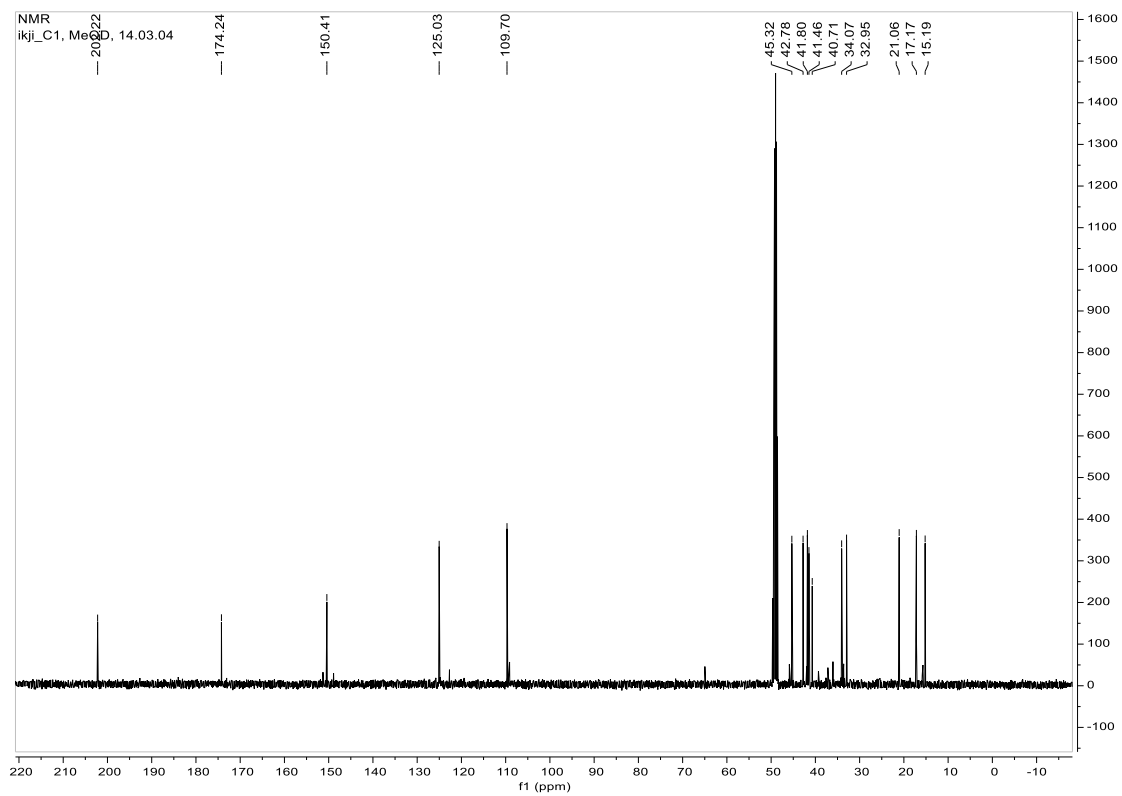

**Figure S4.**  $^{13}\text{C}$ -NMR spectrum of nootkatone (**1**) (100 MHz,  $\text{CD}_3\text{OD}$ ).

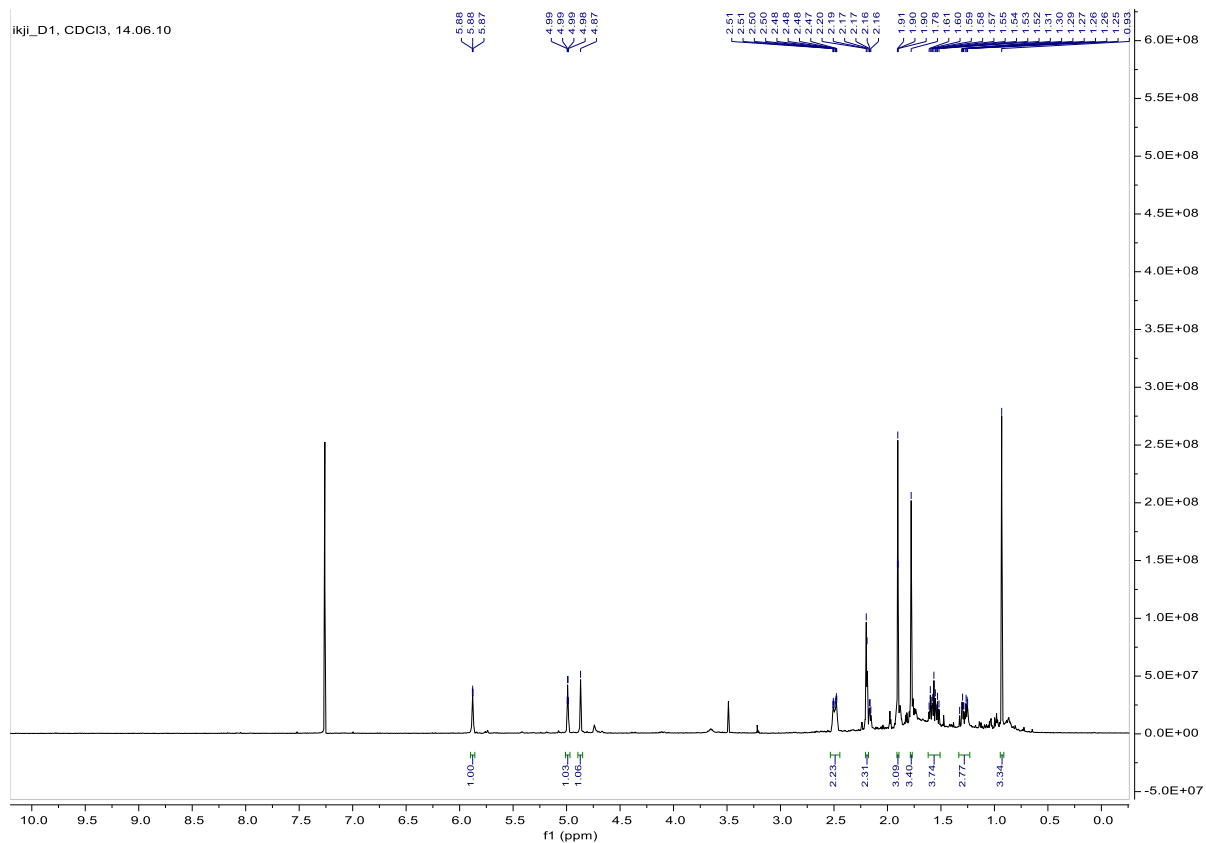

**Figure S5.** <sup>1</sup>H-NMR spectrum of eudesma-3,11-dien-2-one (**2**) (400 MHz, CDCl<sub>3</sub>).

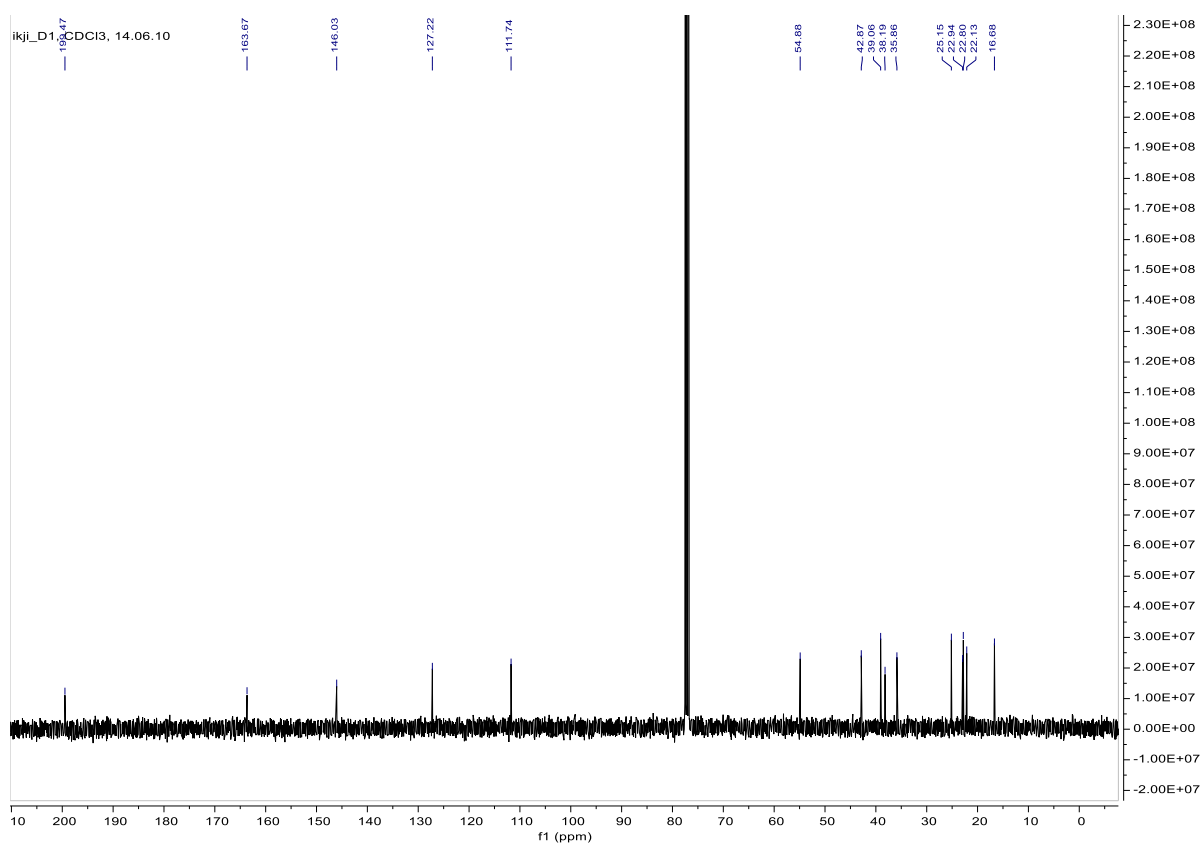

**Figure S6.** <sup>13</sup>C-NMR spectrum of eudesma-3,11-dien-2-one (**2**) (100 MHz, CDCl<sub>3</sub>).

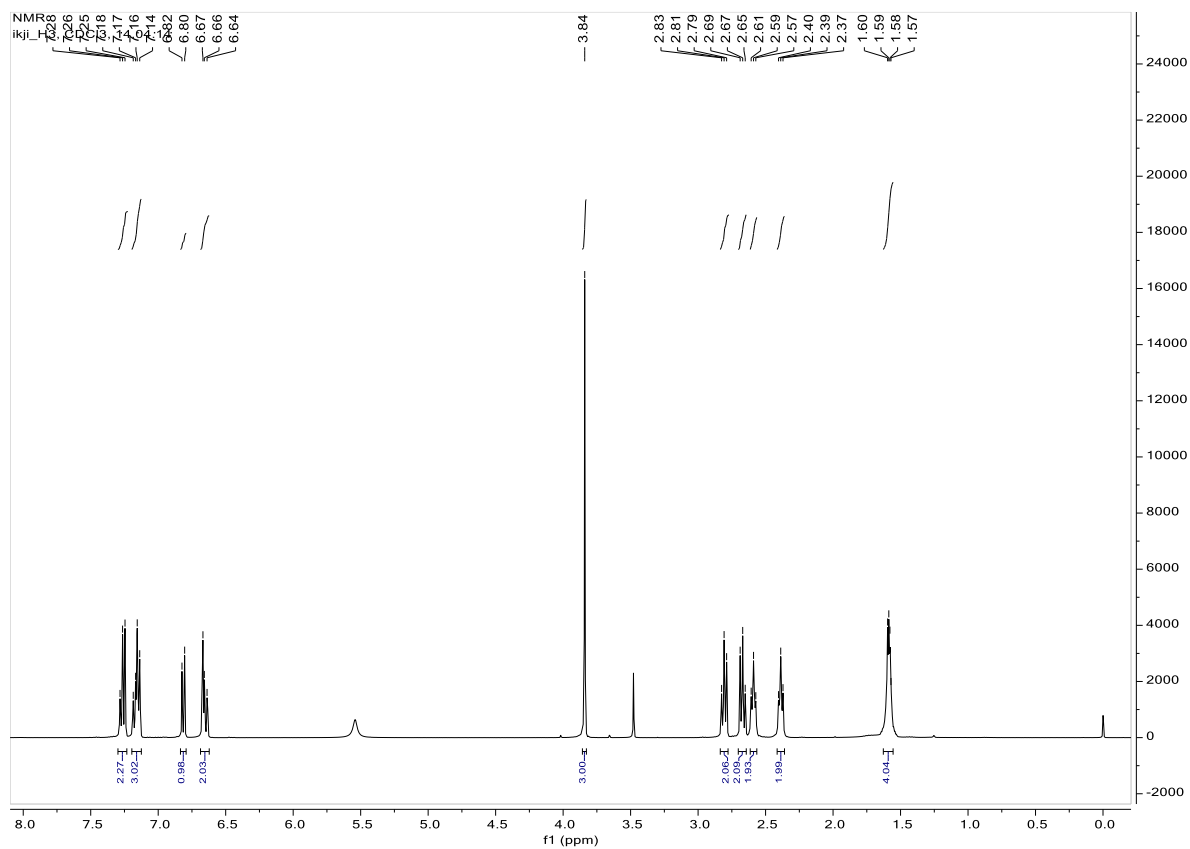

**Figure S7.  $^1\text{H}$ -NMR spectrum of yakuchinone A (3) (400 MHz,  $\text{CDCl}_3$ ).**

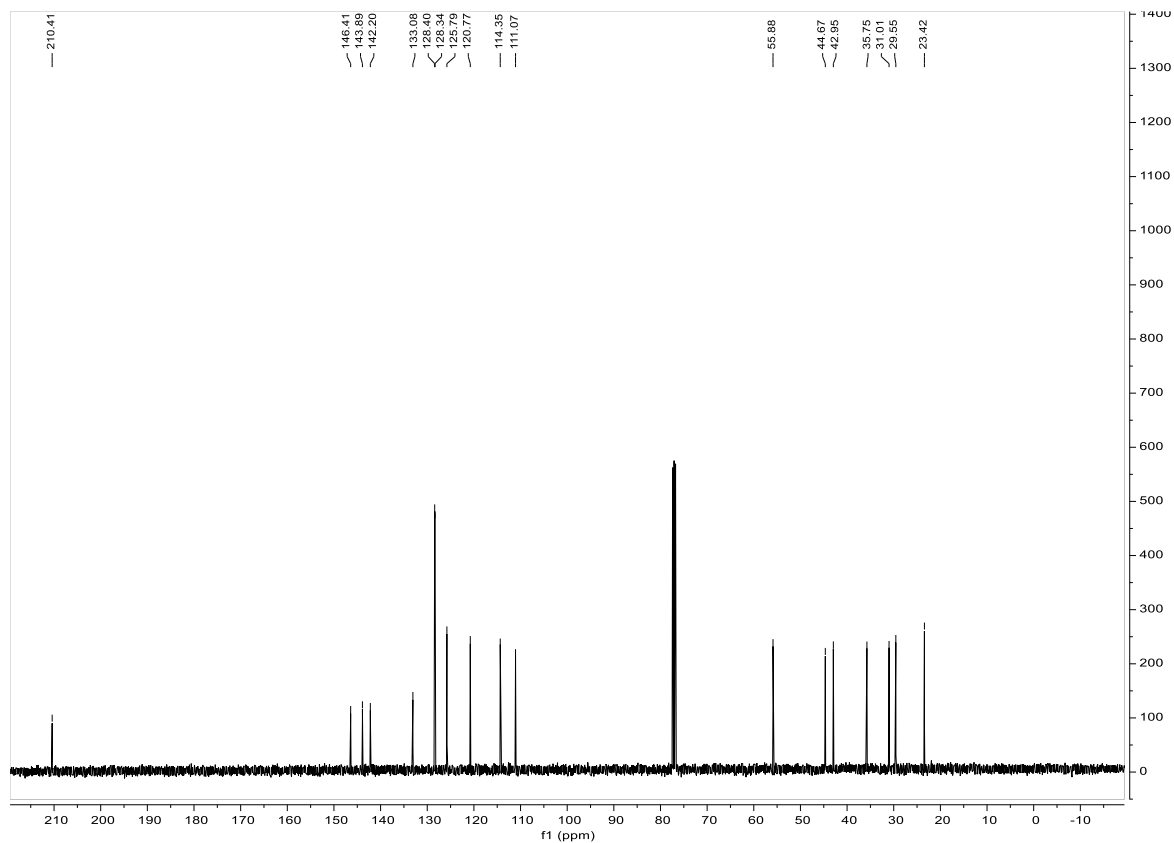

**Figure S8.  $^{13}\text{C}$ -NMR spectrum of yakuchinone A (3) (100 MHz,  $\text{CDCl}_3$ ).**



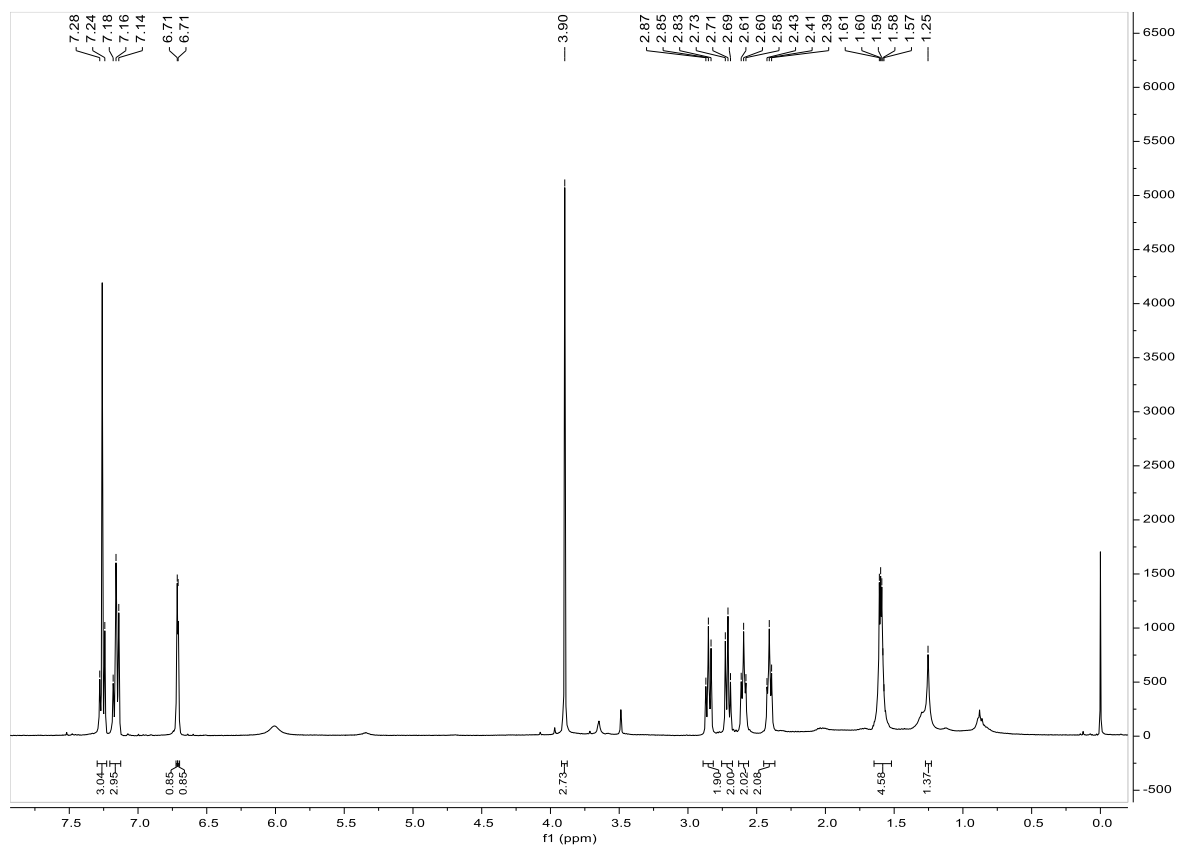

Figure S9. <sup>1</sup>H-NMR spectrum of 5'-hydroxyl-yakuchinone A (**4**) (400 MHz, CDCl<sub>3</sub>).

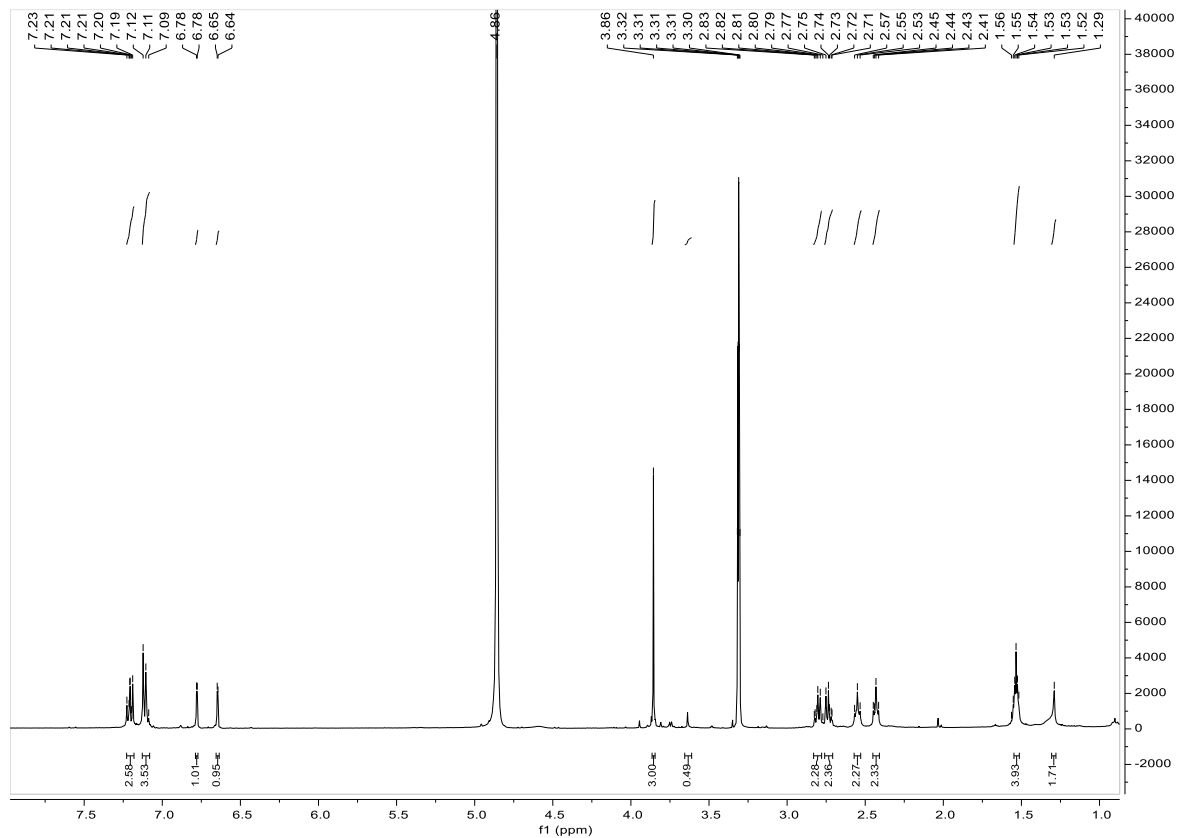

Figure S10. <sup>1</sup>H-NMR spectrum of 5'-hydroxyl-yakuchinone A (**4**) (300 MHz, CD<sub>3</sub>OD).

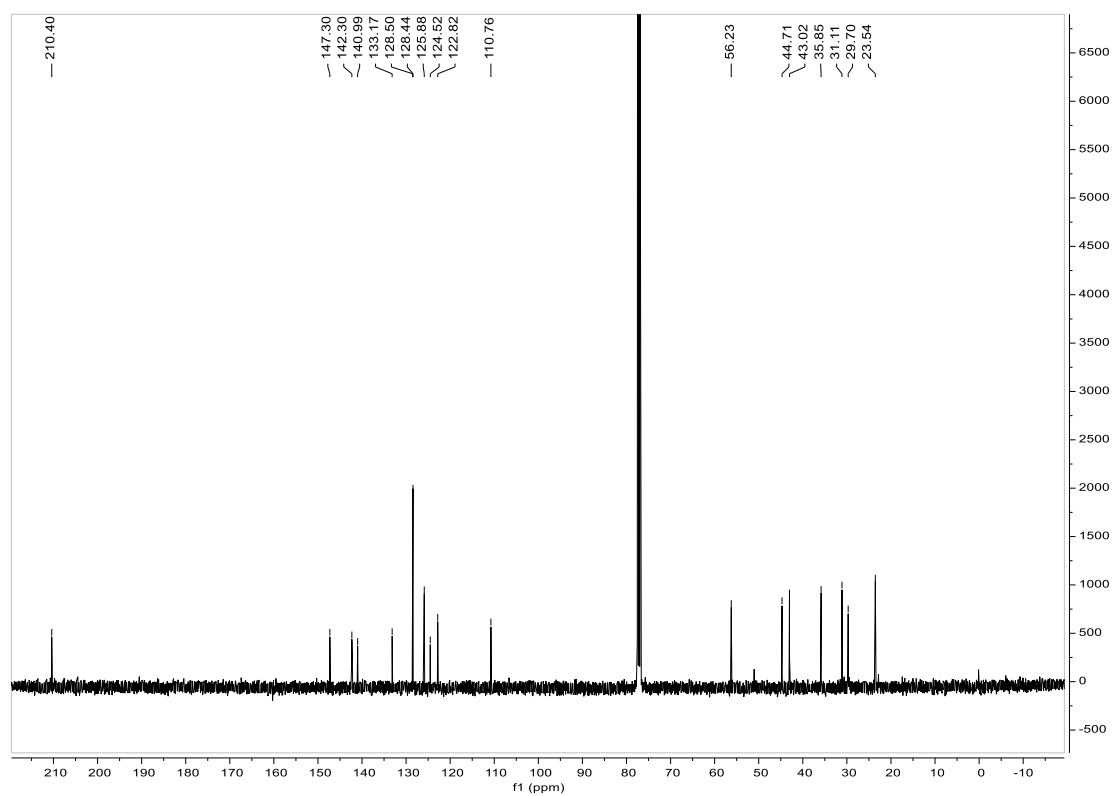

**Figure S11.**  $^{13}\text{C}$ -NMR spectrum of 5'-hydroxyl-yakuchinone A (**4**) (100 MHz,  $\text{CDCl}_3$ ).

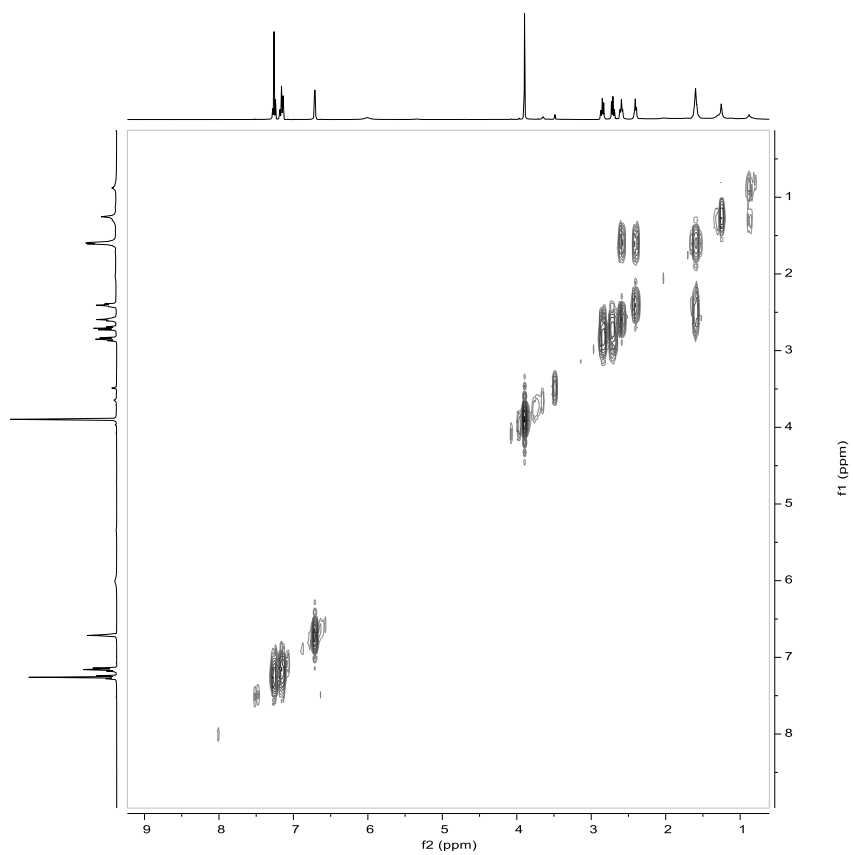

**Figure S12.**  $^1\text{H}$ - $^1\text{H}$  COSY spectrum of 5'-hydroxyl-yakuchinone A (**4**) (400 MHz,  $\text{CDCl}_3$ ).

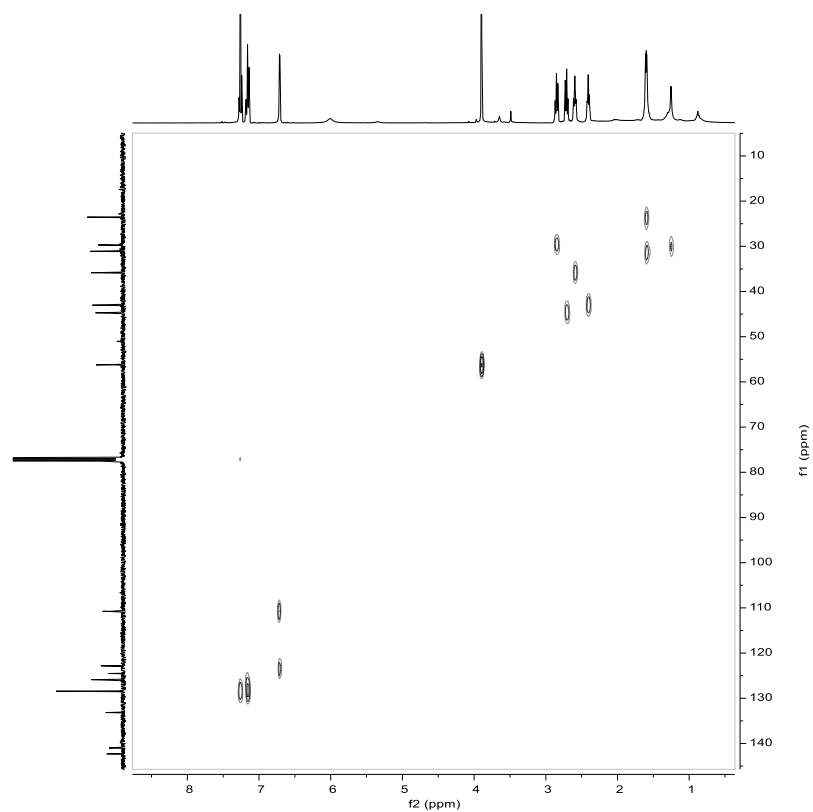

**Figure S13.** HSQC spectrum of 5'-hydroxyl-yakuchinone A (**4**) (CDCl<sub>3</sub>).

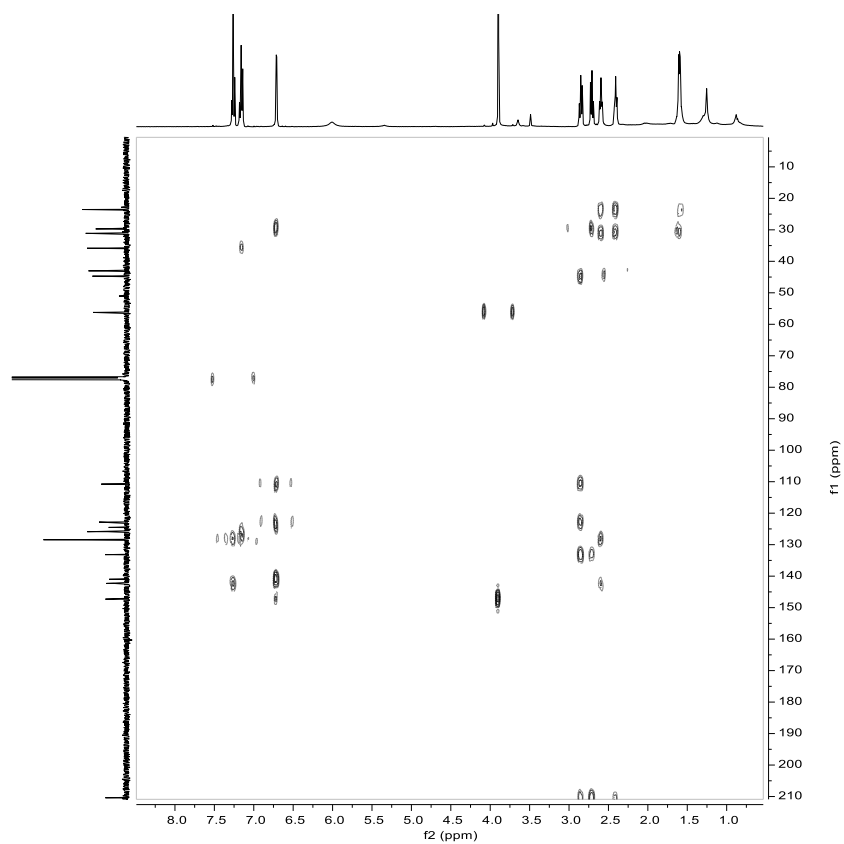

**Figure S14.** HMBC spectrum of 5'-hydroxyl-yakuchinone A (**4**) (CDCl<sub>3</sub>).

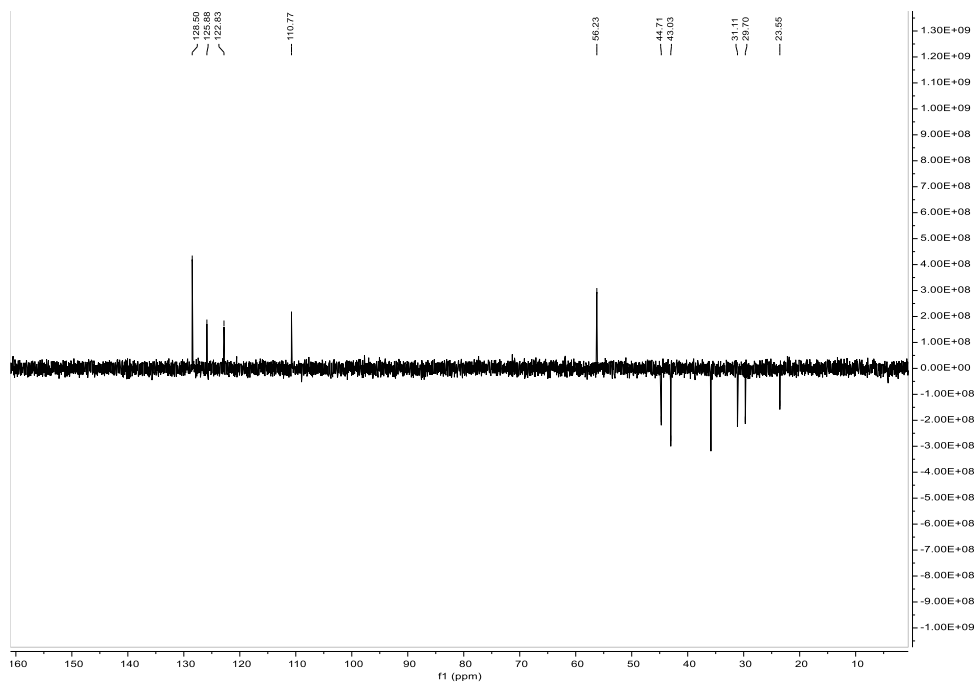

**Figure S15.** DEPE-135 spectrum of 5'-hydroxyl-yakuchinone A (**4**) ( $\text{CDCl}_3$ ).

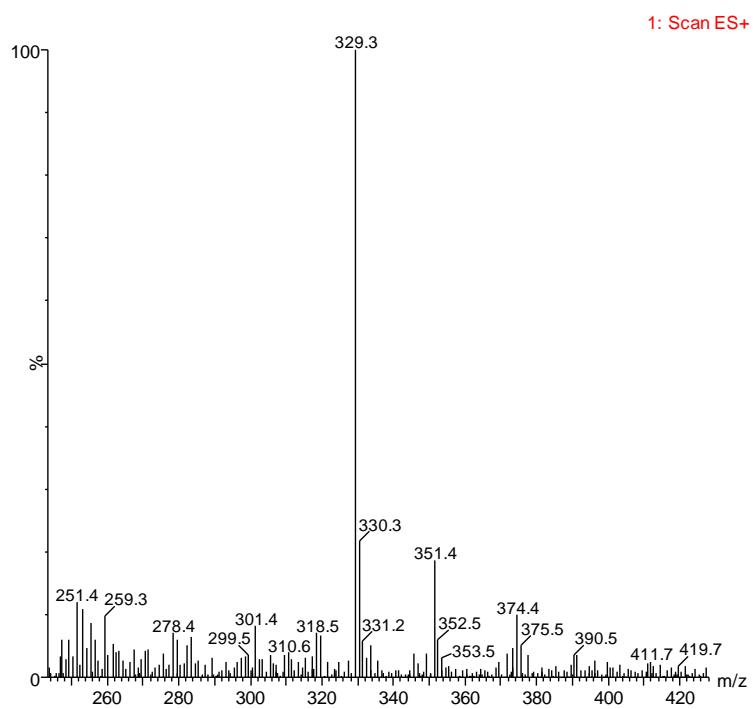

**Figure S16.** ESI-MS spectrum of 5'-hydroxyl-yakuchinone A (**4**).

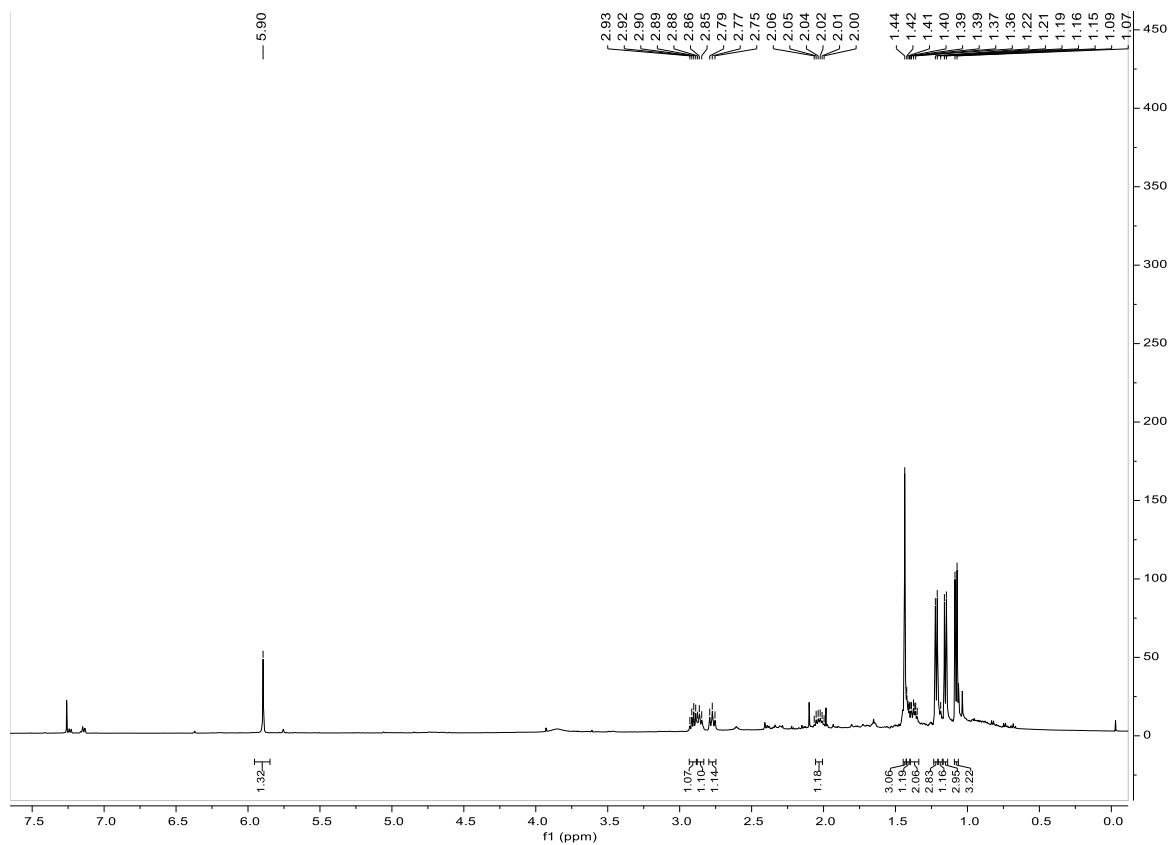

Figure S17.  $^1\text{H}$ -NMR spectrum of alpinenone (**5**) (500 MHz,  $\text{CDCl}_3$ ).

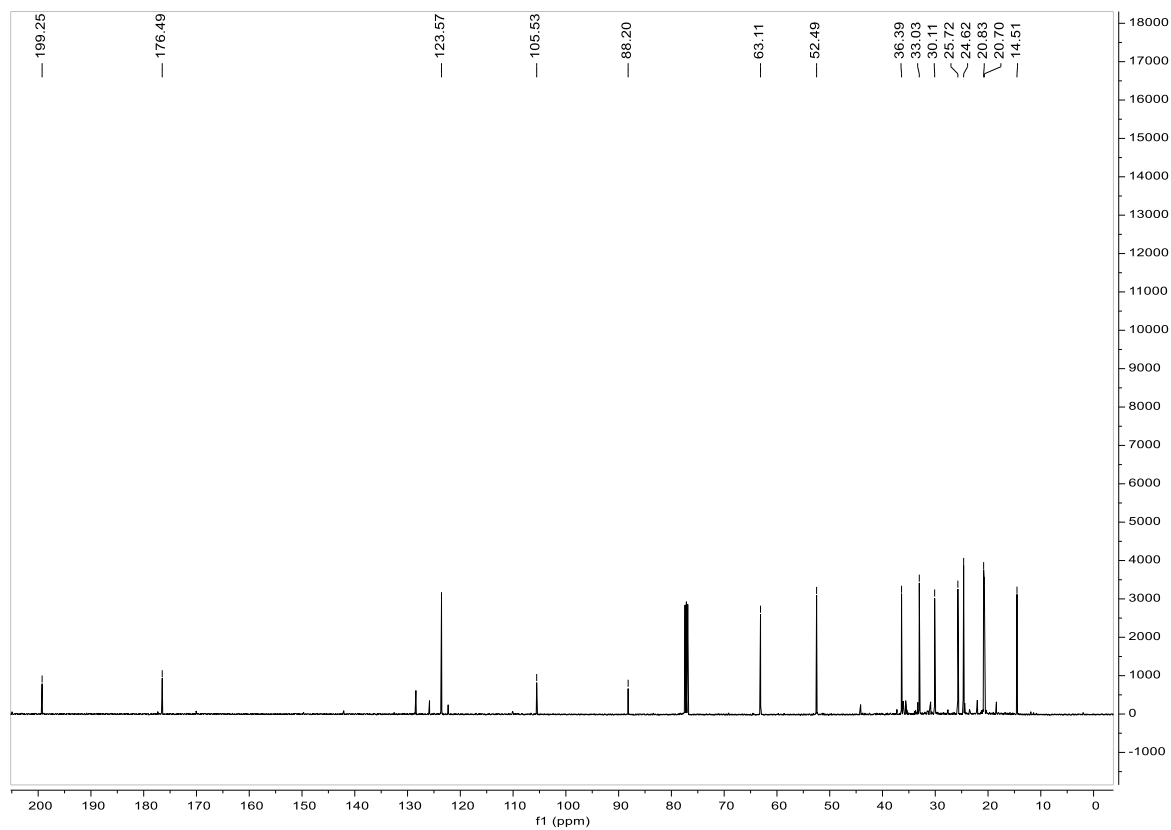

Figure S18.  $^{13}\text{C}$ -NMR spectrum of alpinenone (**5**) (125 MHz,  $\text{CDCl}_3$ ).

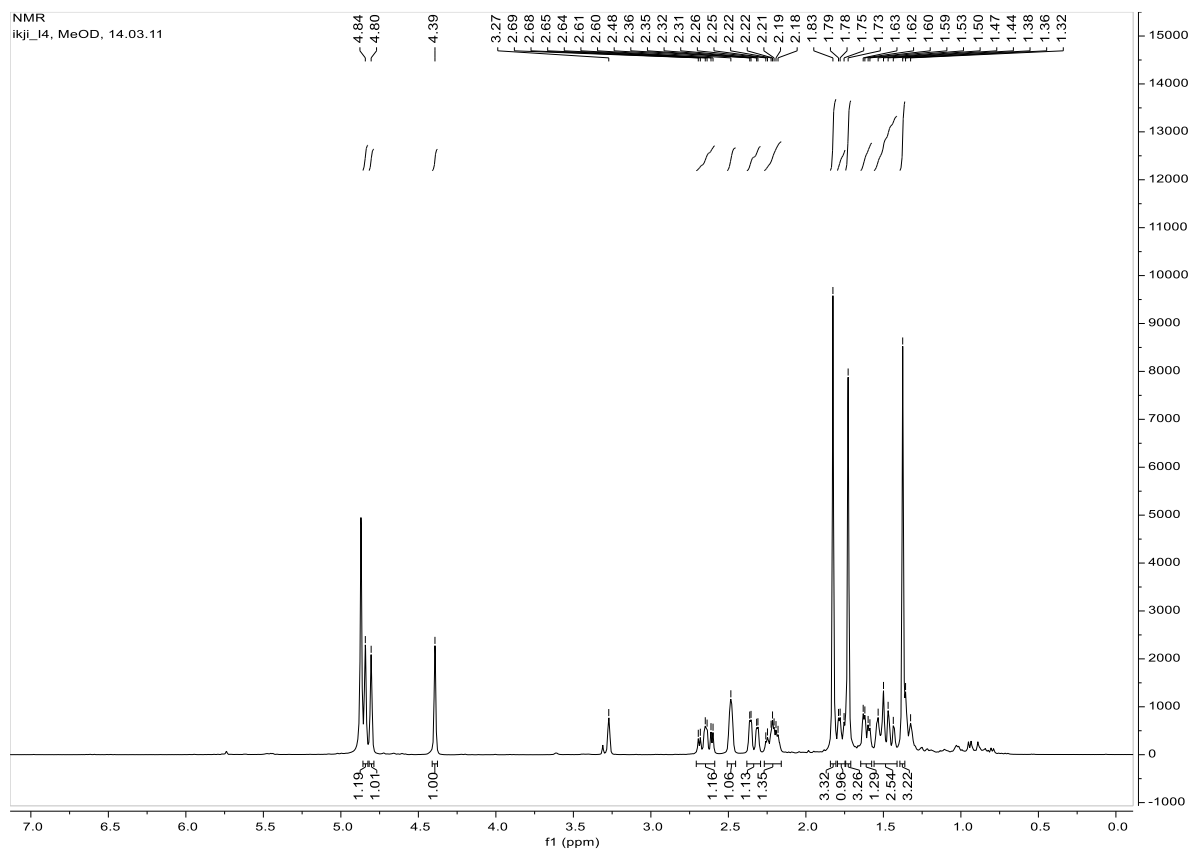

**Figure S19.**  $^1\text{H}$ -NMR spectrum of 6 $\alpha$ -hydroxy-7-*epi*- $\alpha$ -cyperone (**6**) (400 MHz,  $\text{CD}_3\text{OD}$ ).

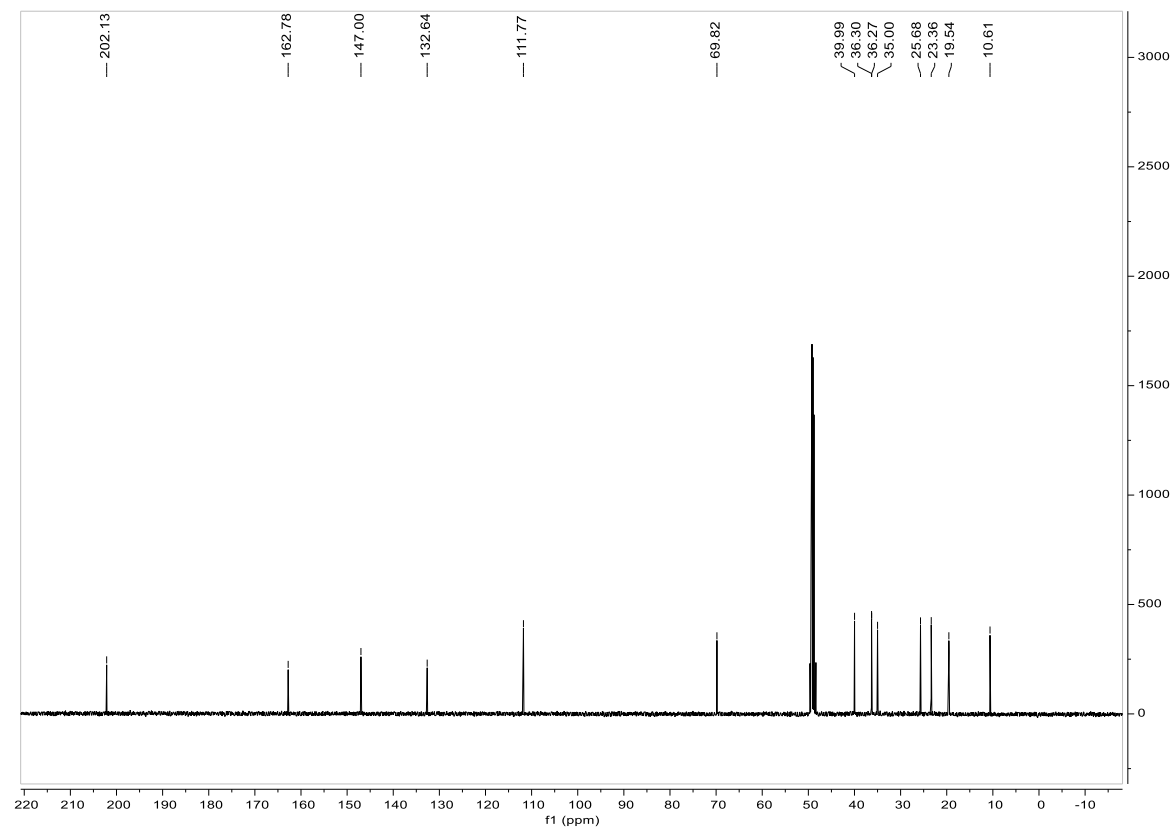

**Figure S20.**  $^{13}\text{C}$ -NMR spectrum of 6 $\alpha$ -hydroxy-7-*epi*- $\alpha$ -cyperone (**6**) (100 MHz,  $\text{CD}_3\text{OD}$ ).

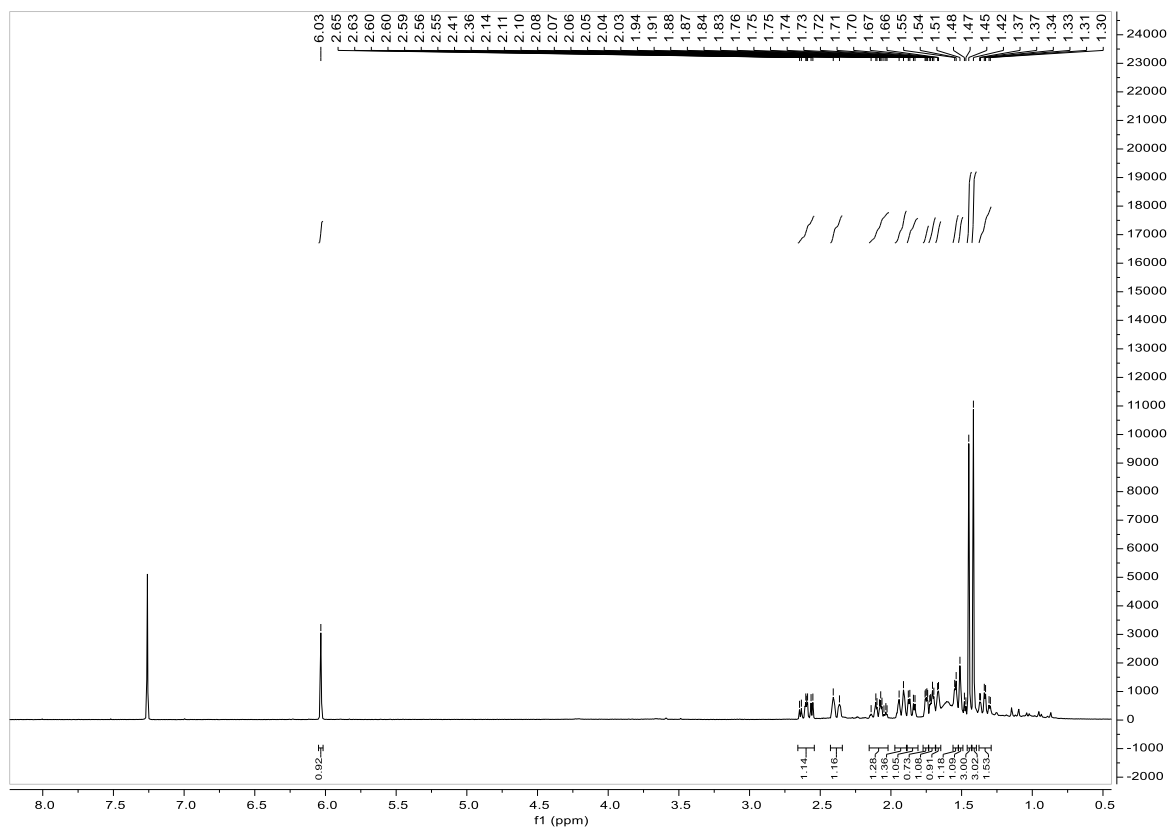

Figure S21. <sup>1</sup>H-NMR spectrum of (4*S*\*,5*E*,10*R*\*)-7-oxo-tri-nor-eudesm-5-en-4β-ol (**7**) (400 MHz, CDCl<sub>3</sub>).

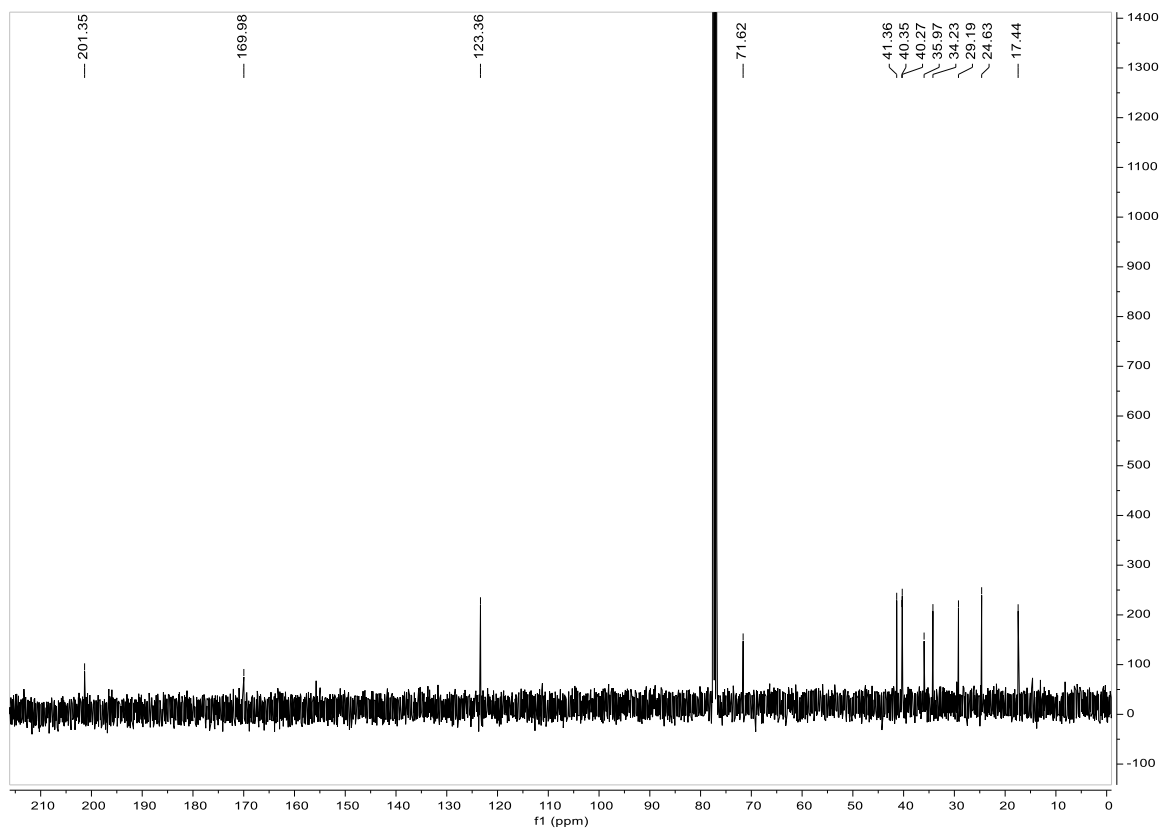

Figure S22. <sup>13</sup>C-NMR spectrum of (4*S*\*,5*E*,10*R*\*)-7-oxo-tri-nor-eudesm-5-en-4β-ol (**7**) (100 MHz, CDCl<sub>3</sub>).

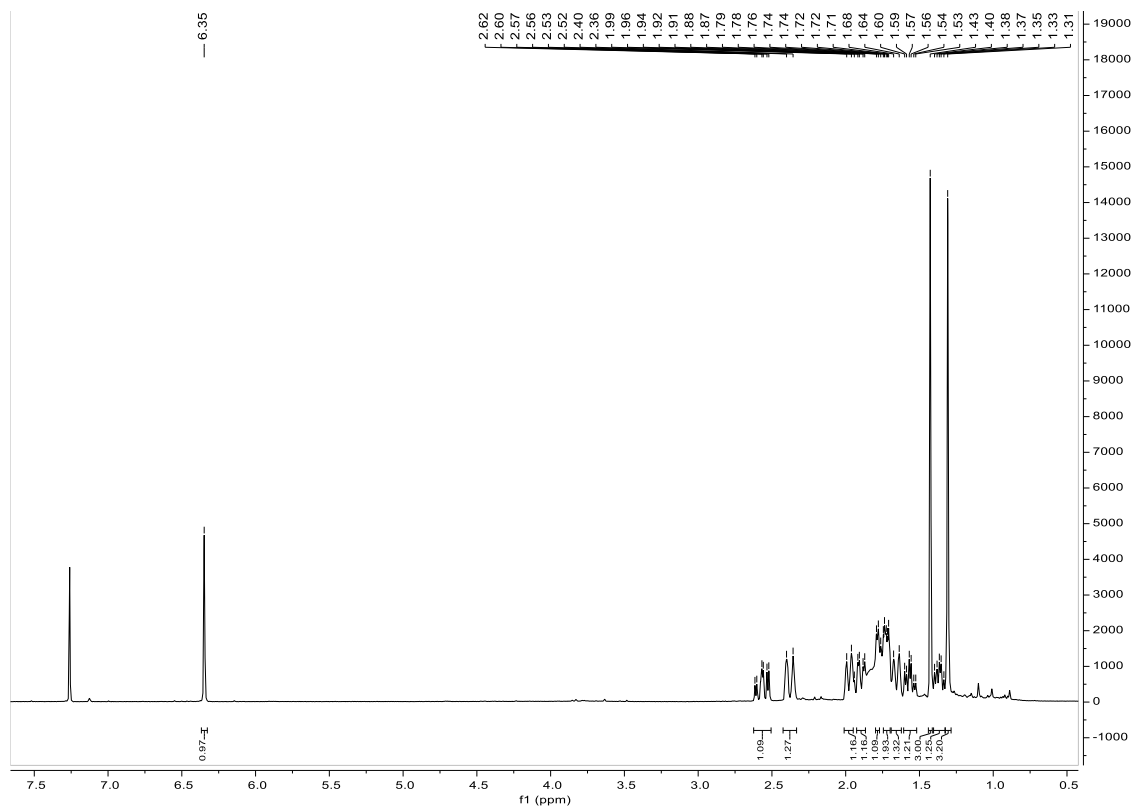

**Figure S23.** <sup>1</sup>H-NMR spectrum of teuhetenone A (**8**) (400 MHz, CDCl<sub>3</sub>).

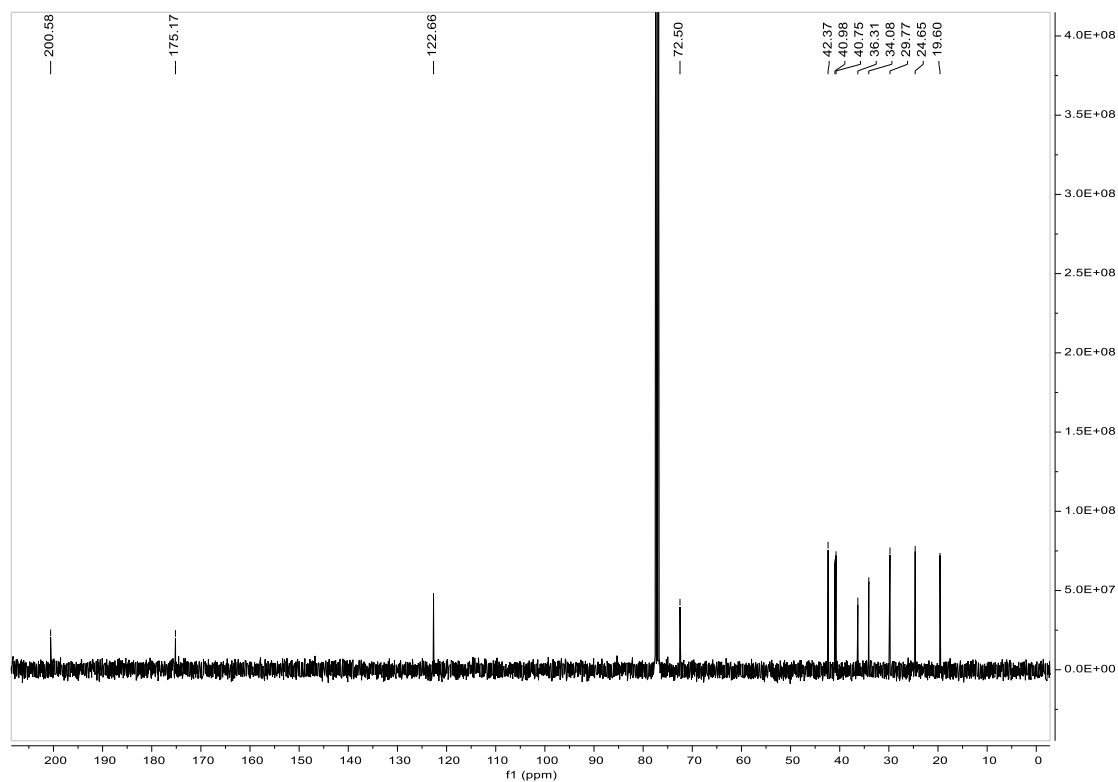

**Figure S24.** <sup>13</sup>C-NMR spectrum of teuhetenone A (**8**) (100 MHz, CDCl<sub>3</sub>).



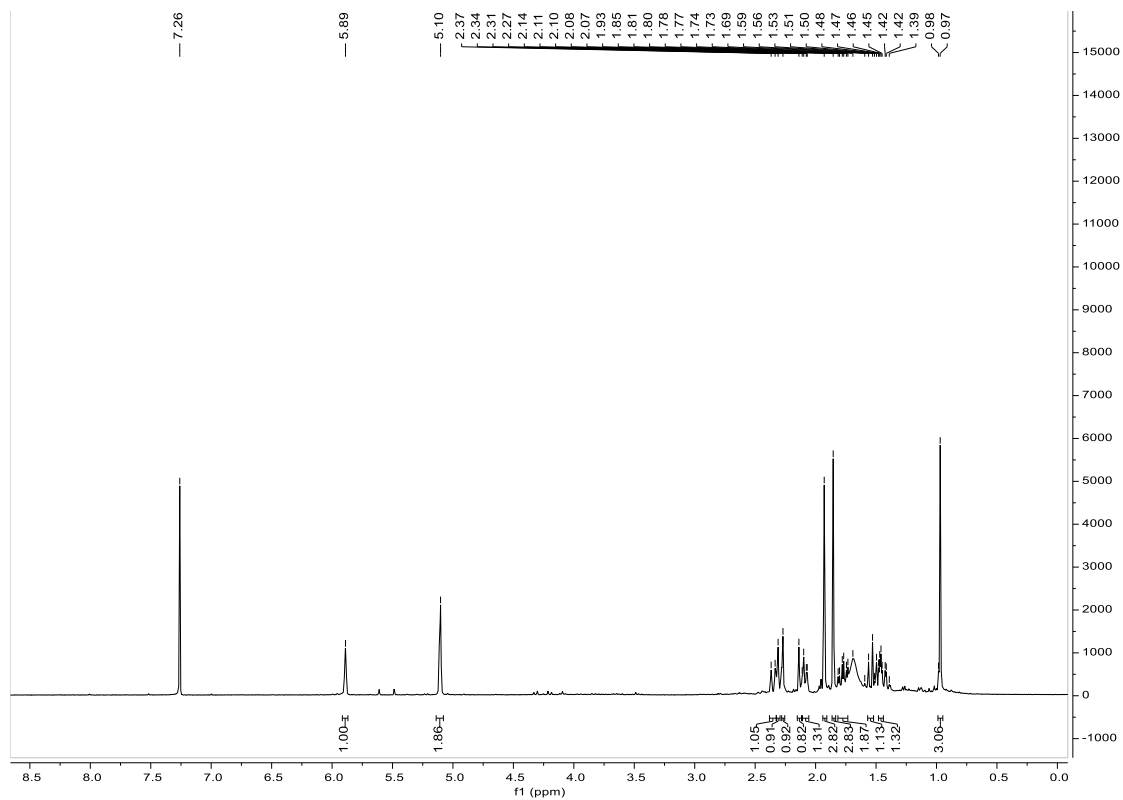

Figure S25.  $^1\text{H}$ -NMR spectrum of 7-*epi*-teucrone B (**9**) (400 MHz,  $\text{CDCl}_3$ ).

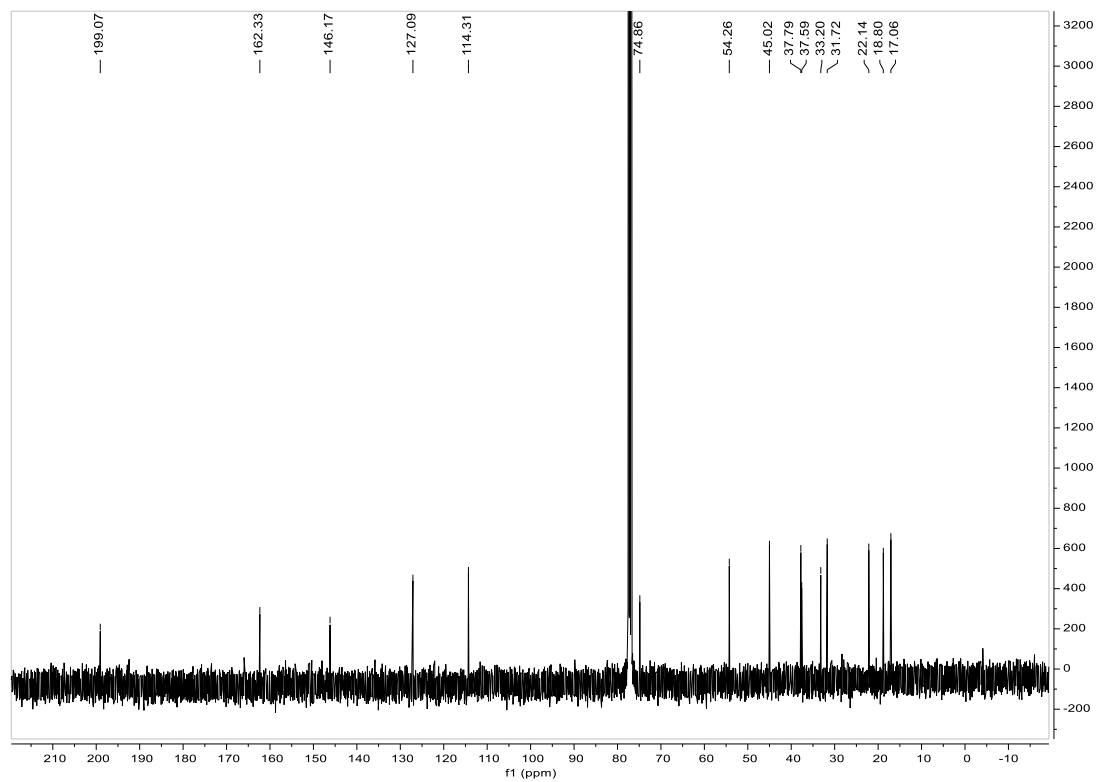

Figure S26.  $^{13}\text{C}$ -NMR spectrum of 7-*epi*-teucrone B (**9**) (100 MHz,  $\text{CDCl}_3$ ).

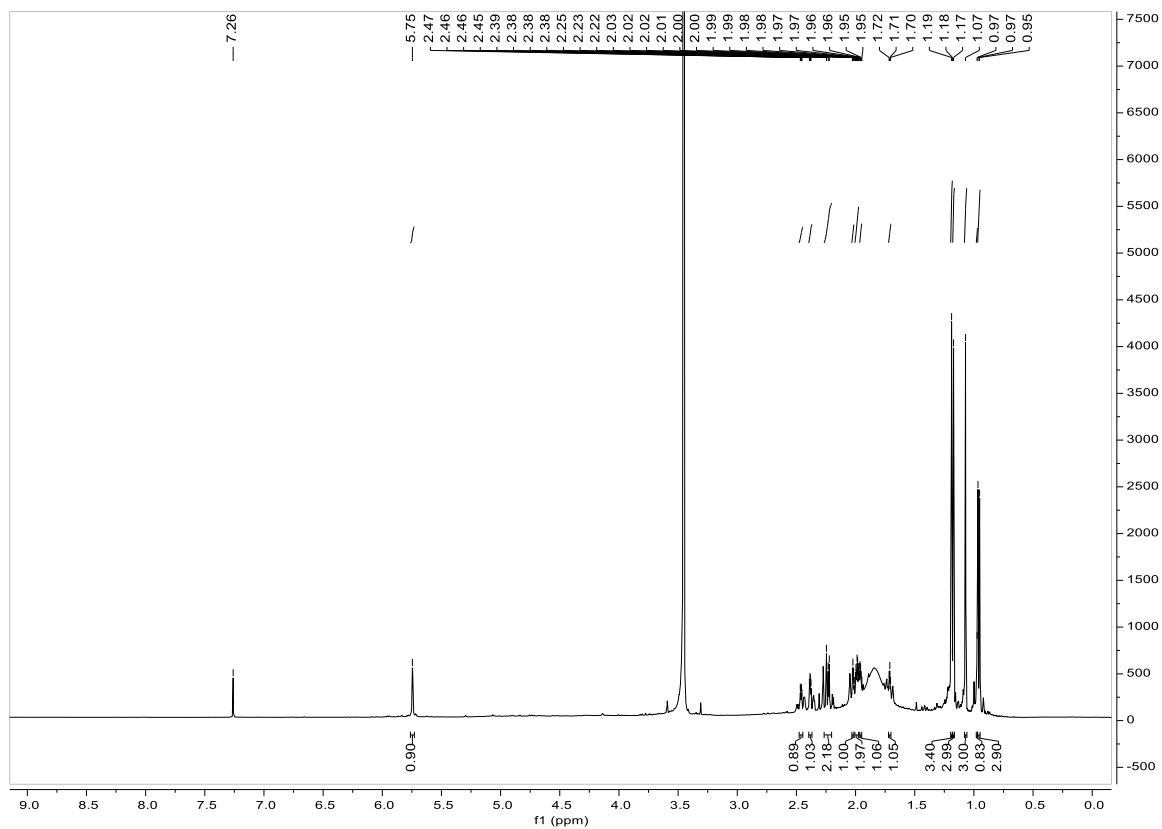

**Figure S27.** <sup>1</sup>H-NMR spectrum of 11-hydroxyvalenc-1(10)-en-2-one (**10**) (400 MHz, CDCl<sub>3</sub>).

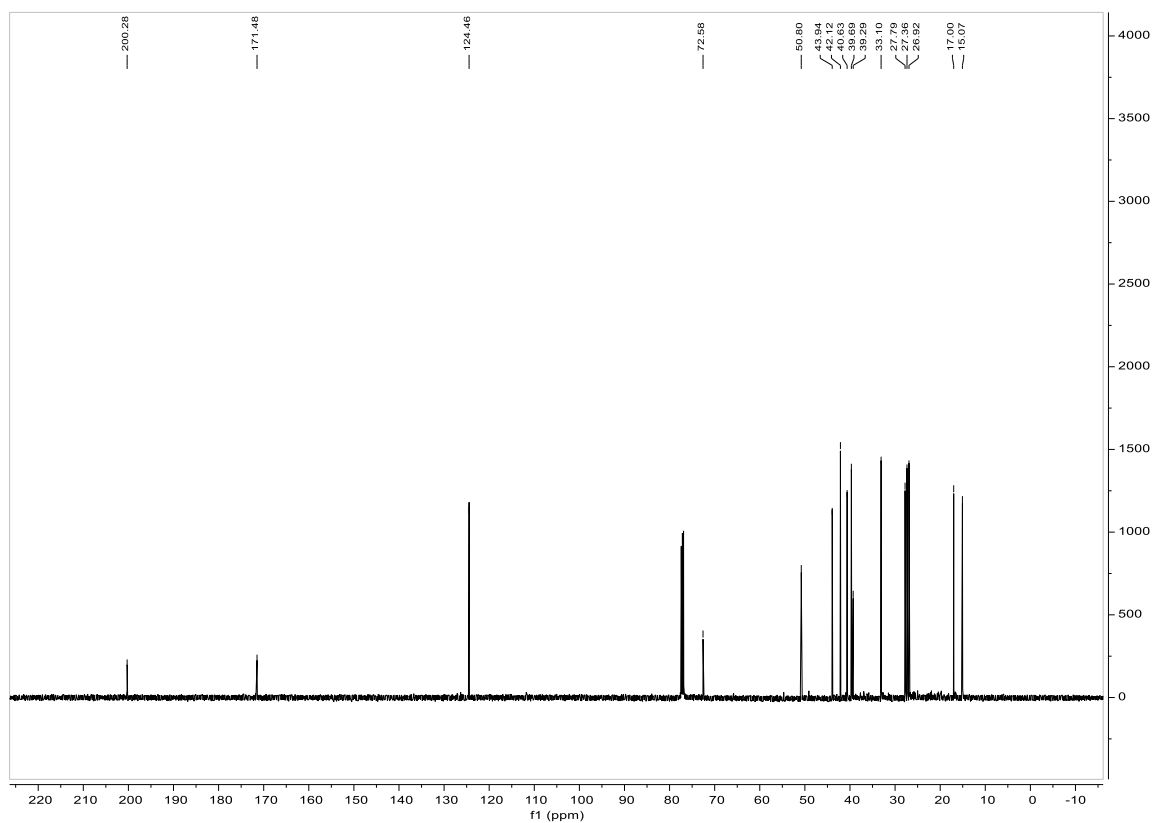

**Figure S28.** <sup>13</sup>C-NMR spectrum of 11-hydroxyvalenc-1(10)-en-2-one (**10**) (100 MHz, CDCl<sub>3</sub>).

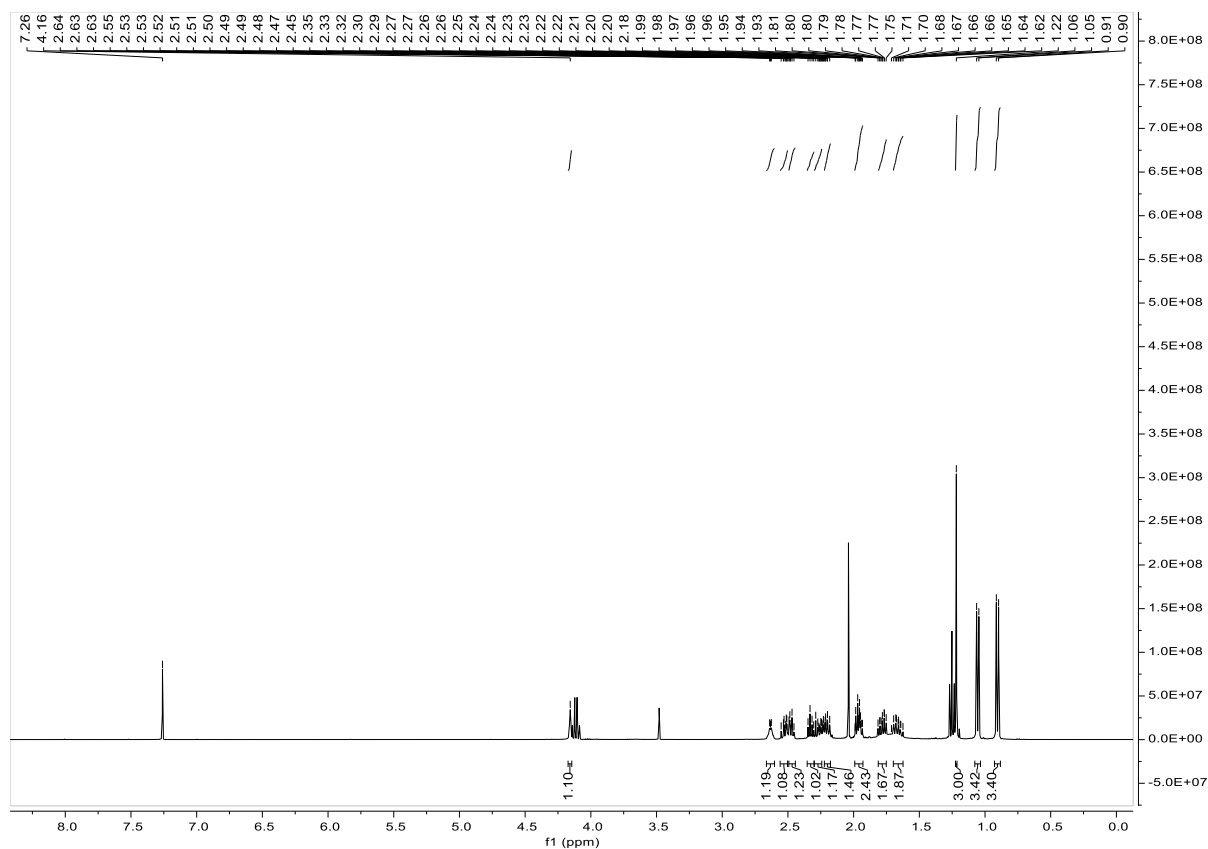

**Figure S29.** <sup>1</sup>H-NMR spectrum of oxyphyllenodiol A (**11**) (400 MHz, CDCl<sub>3</sub>).

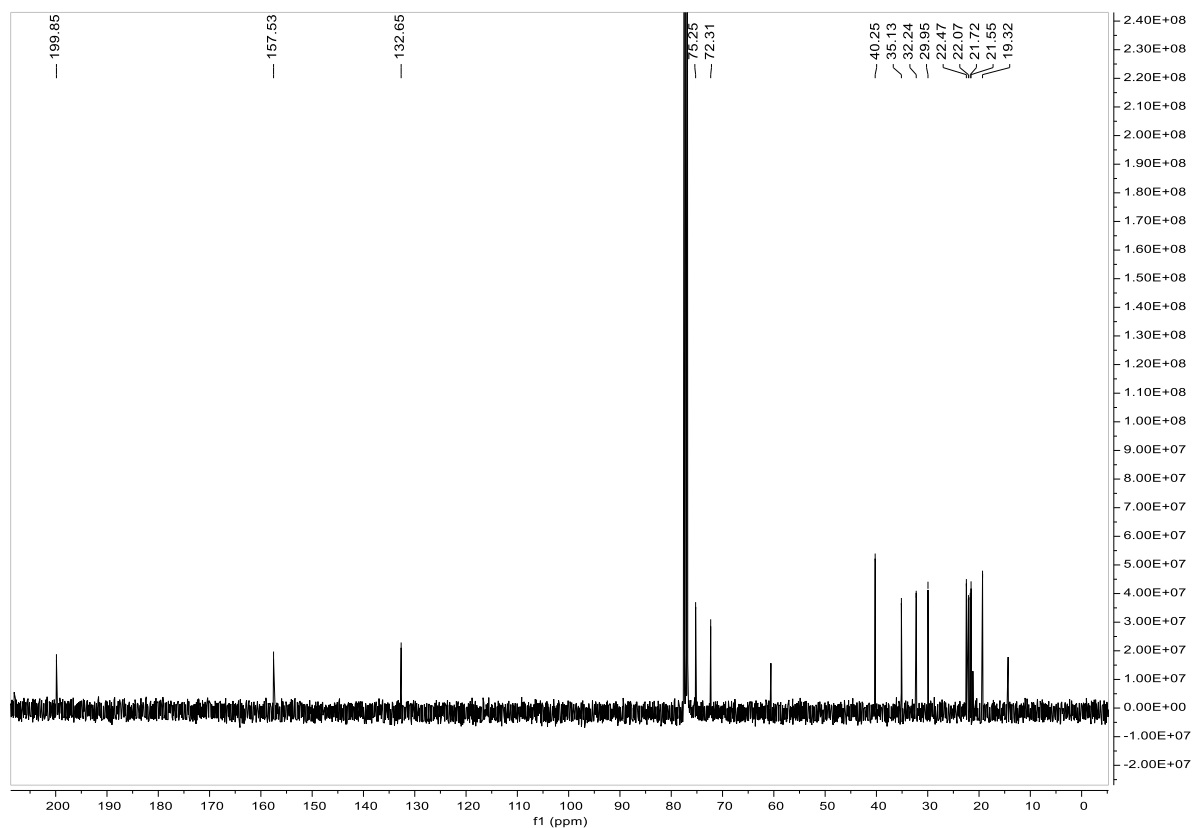

**Figure S30.** <sup>13</sup>C-NMR spectrum of oxyphyllenodiol A (**11**) (100 MHz, CDCl<sub>3</sub>).

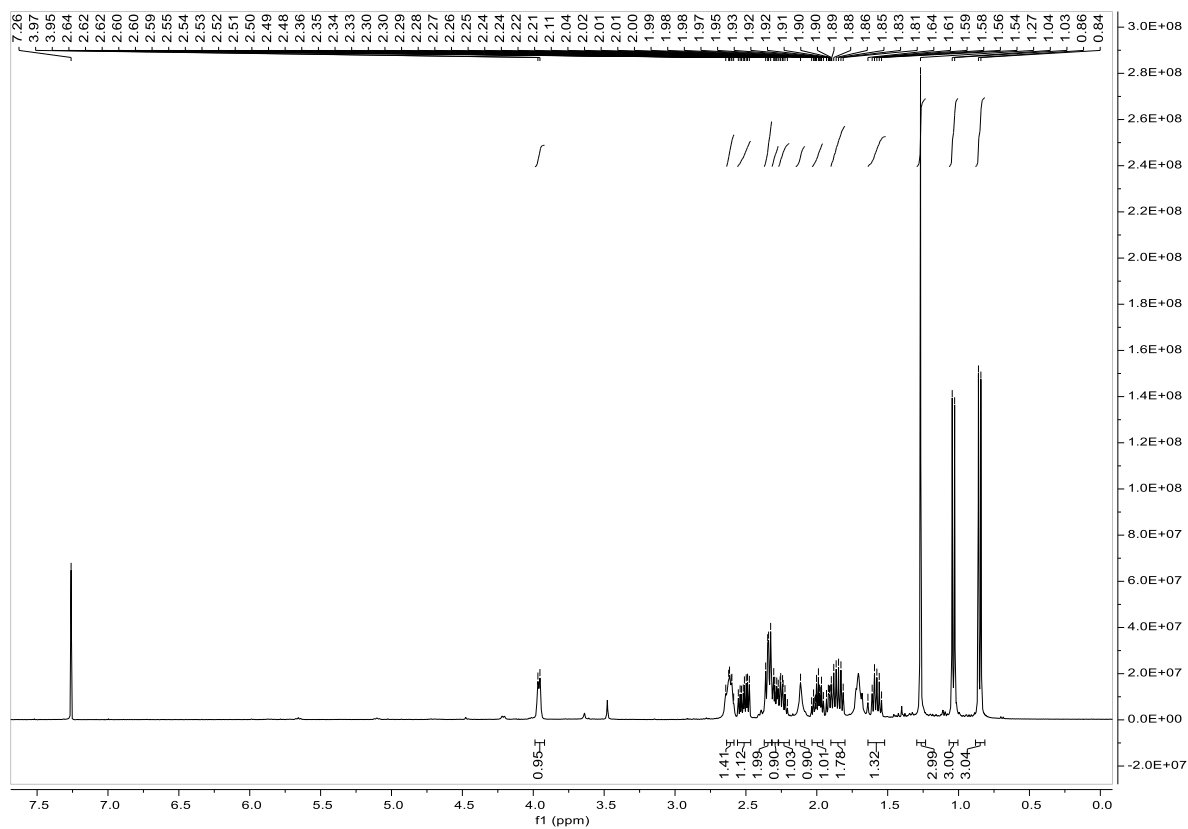

**Figure S31.**  $^1\text{H}$ -NMR spectrum of oxyphyllenodiol B (**11**) (400 MHz,  $\text{CDCl}_3$ ).

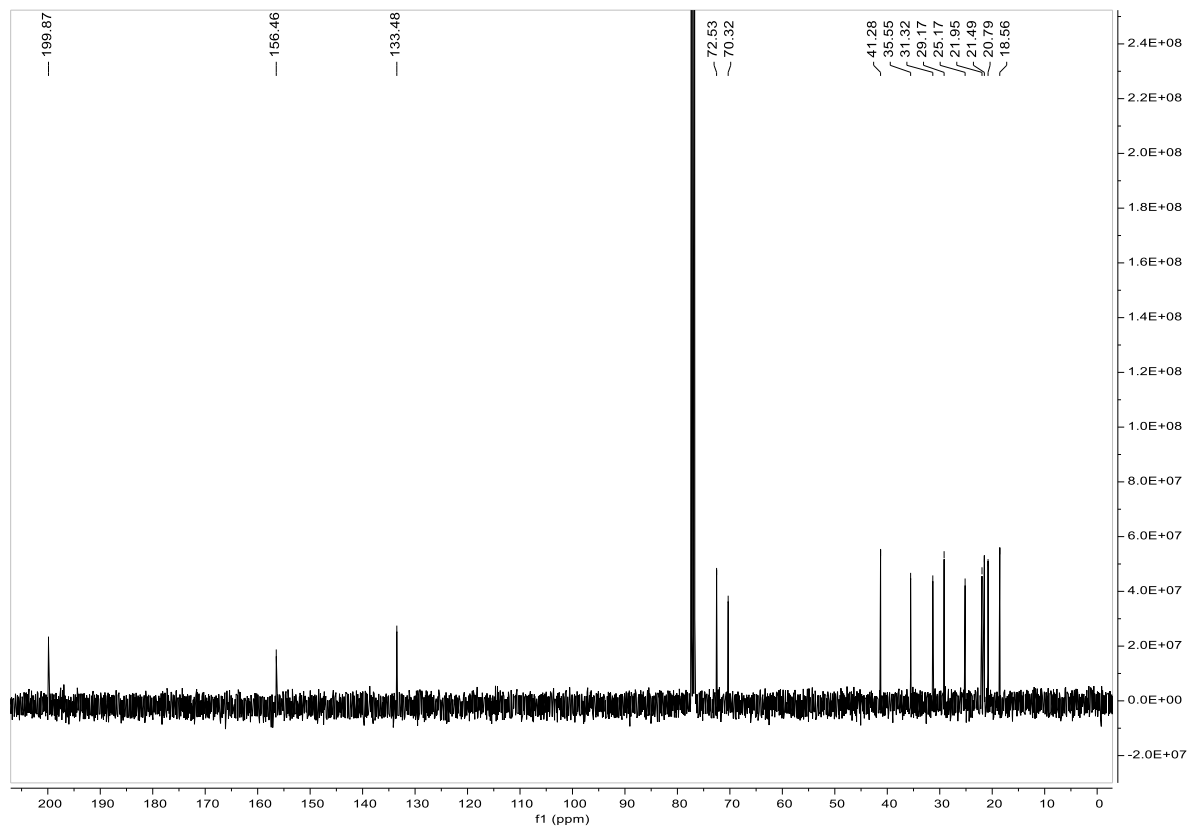

**Figure S32.**  $^{13}\text{C}$ -NMR spectrum of oxyphyllenodiol B (**11**) (100 MHz,  $\text{CDCl}_3$ ).

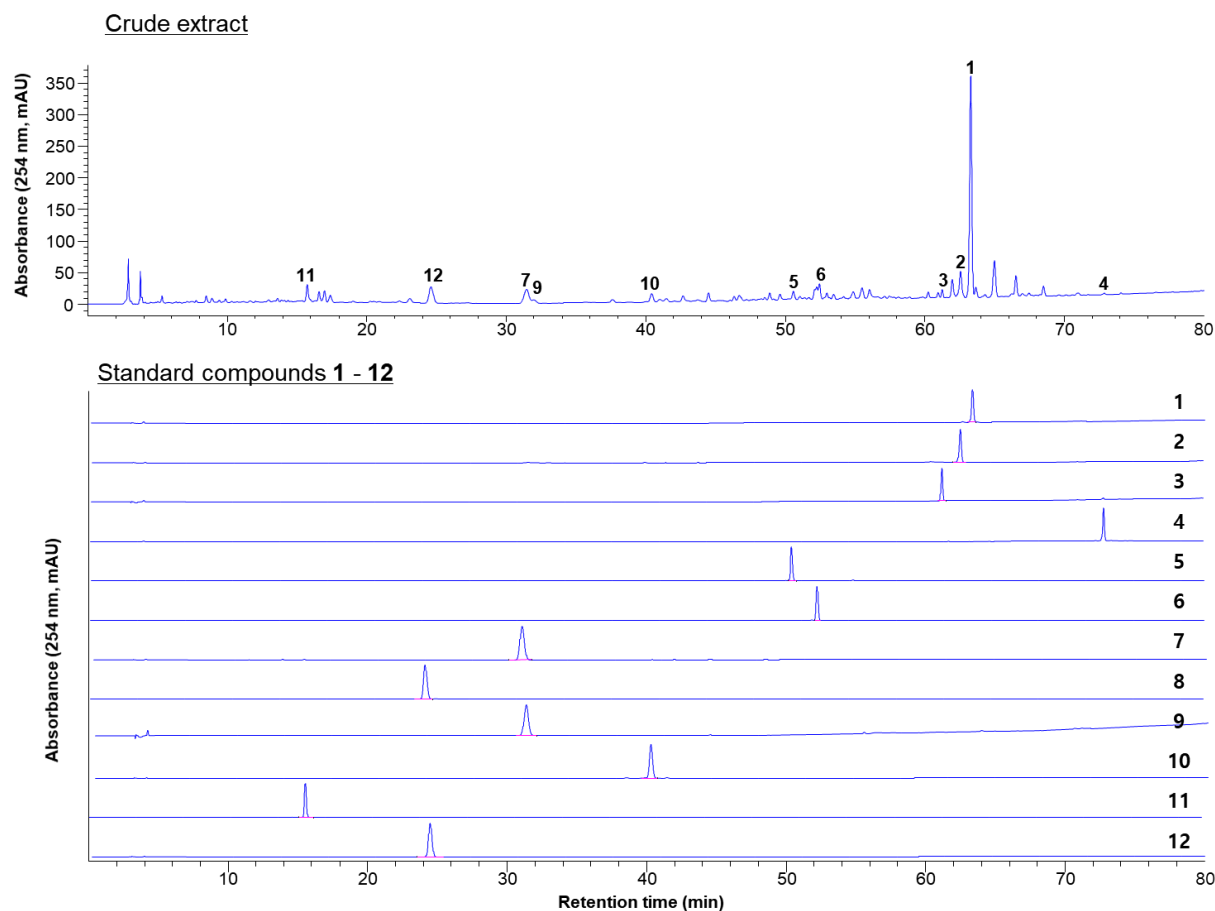

**Figure S33.** HPLC chromatograms of crude extract and isolated compounds **1** – **12**. Detailed HPLC conditions were described in Materials and Methods section. Isolated compounds: nootkatone (**1**), eudesma-3,11-dien-2-one (**2**), yakuchinone A (**3**), 5'-hydroxyl-yakuchinone A (**4**), alpinenone (**5**), 6 $\alpha$ -hydroxy-cyperone (**6**), (4*S*, 5*E*, 10*R*)-7-oxo-tri-nor-eudesm-5-en-4 $\beta$ -ol (**7**), teuhetenone A (**8**), 7-*epi*-teucrone B (**9**), 11-hydroxyvalenc-1(10)-en-2-one (**10**), oxyphyllenodiol A (**11**), and oxyphyllenodiol B (**12**)

**Table S2.** Retention time and calibration curves of compounds **1** - **12**.

| Compounds                                                                                     | Retention time (min) | Calibration equation | Correlation factor (R <sup>2</sup> ) |
|-----------------------------------------------------------------------------------------------|----------------------|----------------------|--------------------------------------|
| Nootkatone ( <b>1</b> )                                                                       | 63.3                 | Y = 18.723X - 341.88 | 0.9987                               |
| Eudesma-3,11-dien-2-one ( <b>2</b> )                                                          | 62.5                 | Y = 14.920X - 66.133 | 0.9999                               |
| Yakuchinone A ( <b>3</b> )                                                                    | 61.2                 | Y = 1.2982X + 3.35   | 0.9998                               |
| 5'-Hydroxyl-yakuchinone A ( <b>4</b> )                                                        | 72.8                 | Y = 4.297X - 12.025  | 0.9999                               |
| Alpinenone ( <b>5</b> )                                                                       | 50.5                 | Y = 10.708X - 130.43 | 0.9999                               |
| 6 $\alpha$ -Hydroxy-cyperone ( <b>6</b> )                                                     | 52.2                 | Y = 25.533X - 86.608 | 0.9986                               |
| (4 <i>S</i> , 5 <i>E</i> , 10 <i>R</i> )-7-Oxo-tri-nor-eudesm-5-en-4 $\beta$ -ol ( <b>7</b> ) | 30.9                 | Y = 18.057X - 275.68 | 0.9999                               |
| Teuhetenone A ( <b>8</b> )                                                                    | 24.1                 | Y = 27.269X - 193.52 | 0.9997                               |
| 7- <i>epi</i> -Teucrone B ( <b>9</b> )                                                        | 30.9                 | Y = 0.9248X - 12.3   | 0.9999                               |
| 11-Hydroxyvalenc-1(10)-en-2-one ( <b>10</b> )                                                 | 40.0                 | Y = 11.996X - 264.3  | 0.9991                               |
| Oxyphyllenodiol A ( <b>11</b> )                                                               | 15.6                 | Y = 19.116X - 480.89 | 0.9995                               |
| Oxyphyllenodiol B ( <b>12</b> )                                                               | 24.5                 | Y = 12.733X - 59.5   | 0.9999                               |
